# 1        **Physiologic RNA Targets and Refined Sequence Specificity of Coronavirus EndoU**

2 Rachel Ancar<sup>1</sup>, Yize Li<sup>2</sup>, Eveline Kindler<sup>3</sup> &<sup>4</sup>, Daphne A. Cooper<sup>5</sup>, Monica Ransom<sup>1</sup>, Volker Thiel<sup>3</sup>  
3                    &<sup>4</sup>, Susan R. Weiss<sup>2</sup>, Jay R. Hesselberth<sup>1</sup> and David J. Barton<sup>6\*</sup>

4 <sup>1</sup> Department of Biochemistry and Molecular Genetics, Program in Molecular Biology, School of  
5 Medicine, University of Colorado, Aurora, CO, United States.

6 <sup>2</sup> Department of Microbiology, Perelman School of Medicine, University of Pennsylvania,  
7 Philadelphia Pennsylvania, United States.

8 <sup>3</sup> Institute of Virology and Immunology IVI, Bern, Switzerland.

9 <sup>4</sup> Department of Infectious Diseases and Pathobiology, Vetsuisse Faculty, University of Bern,  
10 Bern, Switzerland.

11 <sup>5</sup> Department of Immunology and Microbiology, School of Medicine, University of Colorado,  
12 Aurora, CO, United States.

13 <sup>6</sup> Department of Immunology and Microbiology, Program in Molecular Biology, School of  
14 Medicine, University of Colorado, Aurora, CO, United States.

15 \* Corresponding Author

16 David J. Barton

17 E-mail: [David.Barton@CUAnschutz.edu](mailto:David.Barton@CUAnschutz.edu)

18 **ABSTRACT**

19 Coronavirus EndoU inhibits dsRNA-activated antiviral responses; however, the physiologic RNA  
20 substrates of EndoU are unknown. In this study, we used mouse hepatitis virus (MHV)-infected  
21 bone-marrow-derived macrophage (BMM) and cyclic phosphate cDNA sequencing to identify  
22 the RNA targets of EndoU. EndoU targeted viral RNA, cleaving the 3' side of pyrimidines with a  
23 strong preference for U<sup>↓</sup>A and C<sup>↓</sup>A sequences (endoY<sup>↓</sup>A). EndoU-dependent cleavage was  
24 detected in every region of MHV RNA, from the 5' NTR to the 3' NTR, including transcriptional  
25 regulatory sequences (TRS). Cleavage at two CA dinucleotides immediately adjacent to the  
26 MHV poly(A) tail suggest a mechanism to suppress negative-strand RNA synthesis and the  
27 accumulation of viral dsRNA. MHV with EndoU (EndoU<sup>mut</sup>) or 2'-5' phosphodiesterase (PDE<sup>mut</sup>)  
28 mutations provoked the activation of RNase L in BMM, with corresponding cleavage of RNAs by  
29 RNase L. The physiologic targets of EndoU are viral RNA templates required for negative-  
30 strand RNA synthesis and dsRNA accumulation.

31 **Impact:** Coronavirus EndoU cleaves U<sup>↓</sup>A and C<sup>↓</sup>A sequences (endoY<sup>↓</sup>A) within viral (+) strand  
32 RNA to evade dsRNA-activated host responses.

### 33 INTRODUCTION

34 Viruses in the order *Nidovirales* express a virus-encoded endoribonuclease, NendoU (1).  
35 NendoU is unique to nidoviruses (2), including viruses of the *Coronaviridae* and *Arteriviridae*  
36 families. Nidoviruses that express NendoU have vertebrate hosts whereas nidoviruses of  
37 crustaceans (*Roniviridae*), and RNA viruses outside the *Nidovirales* order, do not encode this  
38 protein. The precise role(s) of NendoU in virus replication remain enigmatic; however, significant  
39 progress has been made in recent years to elucidate the contributions of NendoU to virus  
40 replication and pathogenesis. The SARS-CoV-2 pandemic underscores the importance of  
41 understanding host-pathogen interactions, including the immunomodulatory functions of EndoU  
42 (3).

43 Arterivirus (nsp11) and coronavirus (nsp15) EndoU proteins have been characterized by  
44 genomic (2), structural (4-6) and biochemical studies (6-8). EndoU is encoded near the 3' end of  
45 ORF1b (Fig. 1A, schematic of MHV genome) (2). Mouse hepatitis virus (MHV), a well-studied  
46 coronavirus, has a single-stranded positive-sense RNA genome 31.1 kb in length. MHV RNA,  
47 like other coronaviruses, is 5' capped and 3' polyadenylated. Upon infection, the ORF1a and  
48 ORF1b regions of MHV RNA are translated into two polyproteins (ORF1a and ORF1ab) through  
49 a frame shifting mechanism (9). MHV proteins nsp1-nsp16 are produced via proteolytic  
50 processing of the ORF1a and ORF1ab polyproteins. EndoU is the nsp15 protein of MHV (Fig.  
51 1A, schematic of MHV RNA genome). Other proteins from the ORF1a/1b region of the RNA  
52 genome include viral proteases and components of the viral replicase (nsp12 is the RdRP,  
53 nsp13 is a helicase, nsp14 is a 3'→5' exonuclease and a N7-methyl transferase, and nsp16 is a  
54 2'-O-methyl transferase). An H277A mutation in nsp15 disables the catalytic activity of EndoU  
55 (Fig. 1A, EndoU<sup>mut</sup>).

56 Coronavirus RNA replication and RNA transcription are mediated by the replicase expressed  
57 from the ORF1a/1b region of the genome, with assistance of the nucleocapsid protein (10). Both

58 RNA replication and RNA transcription occur within membrane-anchored replication organelles  
59 in the cytoplasm of infected cells (11-13). MHV RNA replication involves negative-strand RNA  
60 synthesis, wherein the positive-strand viral RNA genome is copied into a genome-length  
61 negative-strand RNA intermediate, which is subsequently used as a template to make new  
62 positive-strand RNA genomes. MHV RNA transcription involves the synthesis of subgenomic  
63 (sg) negative-strand RNAs from the viral RNA genome via discontinuous transcription  
64 mechanisms and subsequent synthesis of sg mRNAs (14, 15). Intergenic transcriptional  
65 regulatory sequences (TRS) within MHV RNA guide discontinuous transcription mechanisms  
66 (16), leading to the production of sg negative-strand RNAs, which function as templates for the  
67 synthesis of sg mRNAs. A nested set of 3' co-terminal sg mRNAs (sg mRNA2 to sg mRNA7) is  
68 used to express each of the remaining viral proteins [phosphodiesterase (PDE) from sg  
69 mRNA2a; spike (S) from sg mRNA3, and so forth). Hemagglutinin-esterase (HE) is an  
70 unexpressed pseudogene in MHV A59 due to a TRS mutation that prevents the expression of  
71 mRNA2b, as well as a nonsense mutation at codon 15 (17-20). EndoU co-localizes with viral  
72 RNA replication and RNA transcription machinery at membrane-anchored replication organelles  
73 (21, 22). Co-localization of EndoU with viral RNA synthesis machinery may influence the RNAs  
74 targeted by EndoU. Furthermore, coronavirus nsp16, a 2'-O-ribose-methyltransferase (2'-O'MT),  
75 could potentially modify RNA substrates to make them resistant to cleavage by EndoU (1).  
76 These studies suggest that viral RNA stability may be regulated by nsp15 (EndoU) and nsp16  
77 (2'-O'MT).  
78 Intriguingly, neither EndoU (nsp15) nor 2'-O'MT (nsp16) enzyme activities are required for virus  
79 replication in transformed cells in culture (23-25); rather, these enzymes counteract dsRNA-  
80 activated antiviral responses (22, 25, 26). EndoU catalytic activity prevents the activation of  
81 dsRNA-dependent antiviral innate immune pathways (22, 26), including Type I and Type III IFN  
82 responses, PKR and OAS-RNase L (27). EndoU-deficient viruses can replicate in IFNAR<sup>-/-</sup> cells

83 or cells lacking PKR and RNase L (PKR<sup>-/-</sup> & RNase L<sup>-/-</sup>) (22, 26, 27). In addition to EndoU,  
84 coronavirus NS2, a 2'-5' PDE, prevents activation of RNase L (28-30). Thus, there are two  
85 pathways by which MHV prevents activation of OAS-RNase L suggesting this pathway is crucial  
86 for antiviral defense. While coronavirus EndoU inhibits dsRNA-activated antiviral responses  
87 within virus-infected cells, it is unclear how it achieves this because the physiologically relevant  
88 targets of EndoU have not been defined.

89 In this study, we used MHV-infected bone marrow-derived macrophage (BMM) and cyclic  
90 phosphate cDNA sequencing to identify the host and viral RNA targets of EndoU. Cyclic  
91 phosphate cDNA sequencing reveals the location and frequency of endoribonuclease cleavage  
92 sites within host and viral RNAs (31-34). We exploited wildtype and mutant forms of MHV (wt  
93 MHV, PDE<sup>mut</sup>, and EndoU<sup>mut</sup>) along with wildtype and mutant forms of BMM (wt BMM, IFNAR<sup>-/-</sup>  
94 and RNase L<sup>-/-</sup>) to distinguish between EndoU-dependent cleavage sites and RNase L-  
95 dependent cleavage sites within host and viral RNAs.

## 96 **MATERIALS AND METHODS**

### 97 **Viruses**

98 Wildtype Mouse Hepatitis Virus A59 from Volker Thiel [MHV<sup>(V)</sup>] (35-37) and Susan Weiss  
99 [MHV<sup>(S)</sup>] (38) were used, along with a mutant derivative of each. An H277A mutation in nsp15  
100 rendered an EndoU-deficient mutant (EndoU<sup>mut</sup>) from MHV<sup>(V)</sup> (26). An H126R mutation in NS2  
101 rendered a phosphodiesterase mutant (PDE<sup>mut</sup>) from MHV<sup>(S)</sup> (38).

### 102 **Murine bone marrow-derived macrophages**

103 Bone marrow-derived macrophage (BMM) from WT, IFNAR<sup>-/-</sup> and RNase L<sup>-/-</sup> C57BL/6 mice  
104 were obtained as previously described (26). Progenitor cells were isolated from the hind limbs of  
105 8-12 week old mice, passed through a cell strainer and RBCs were lysed using 1 ml of lysis  
106 buffer (0.15 M NH<sub>4</sub>Cl, 1 mM KHCO<sub>3</sub>, 0.1 mM EDTA). Cells were washed 3x with PBS and  
107 cultured in macrophage medium (Iscove's Modified Dulbecco's Medium, 5-10% M-CSF (L929-  
108 supernatant), 0.1% 50 mM 2-mercaptoethanol). Adherent BMM were harvested at 7 dpi.

### 109 **Virus infection**

110 BMM were infected with MHV<sup>(S)</sup>, MHV<sup>(V)</sup>, EndoU<sup>mut</sup>, and PDE<sup>mut</sup> at an MOI of 1 PFU per cell at  
111 37°C as previously described (26). At 9 and 12 hours post-infection (hpi), supernatant was  
112 harvested for virus titration and cells were lysed in Trizol (Invitrogen). MHV in the supernatant  
113 was quantified by standard plaque assay on L2 cells.

### 114 **Cyclic phosphate cDNA sequencing**

115 Total RNA was extracted from cell lysates and split equally for cyclic phosphate and RNAseq  
116 library preparations. Cyclic phosphate cDNA libraries were prepared by DNase treating the total  
117 RNA for 30 min followed by ethanol precipitation with 20 μg of glycogen and ligation with 50 μM  
118 3'-linker in 30 μl final volume. The ligation reactions were conducted using 15 pmol of RtcB

119 ligase (NEB), 1x RtcB buffer (NEB), 100 μM GTP, 1 mM MnCl<sub>2</sub>, 20 units of RNase inhibitor  
120 (Enzymatics) at 37°C for 2 h. Samples were ethanol precipitated with 20 μg of glycogen and  
121 resuspended in 10 μl of RNase free H<sub>2</sub>O for chemical fragmentation (Ambion Fragmentation  
122 Reagent) at 65°C for 4 min. Samples were then denatured in 1 volume of stop dye (95%  
123 formamide, 0.01% xylene cyanol / bromophenol blue), heated to 65°C for 5 min and separated  
124 on a 6 % polyacrylamide TBE–urea gel. Gels were stained with SYBR Gold (Invitrogen) and  
125 visualized to excise RNA larger than adapter (~100-1000 bp). RNA was eluted from the gel  
126 slices with 2 h incubation at 40°C in 0.3 M sodium acetate, pH 5.2, 1 mM EDTA, pH 8.0 followed  
127 by gentle mixing overnight at 4°C. Eluted RNA was recovered by ethanol precipitation with 20  
128 μg of glycogen and resuspended in 12 μl of RNase free H<sub>2</sub>O. RNA was ligated to 50 μM 5'-  
129 linker in 20 μl final volume. The ligation reactions were conducted using 15 pmol of RtcB (NEB),  
130 1x RtcB buffer (NEB), 100 μM GTP, 1 mM MnCl<sub>2</sub>, 20 units of RNase inhibitor (Enzymatics) at  
131 37°C for 2 h followed by ethanol precipitation with 20 μg of glycogen and resuspended in 100 μl  
132 of RNase free H<sub>2</sub>O. Ligated RNAs were purified using 25 μl of magnetic Streptavidin beads  
133 (Invitrogen) washed three times with 100 μl of B&W buffer [5 mM Tris-HCl (pH 7.5), 0.5 mM  
134 EDTA, 1 M NaCl] supplemented with 0.1% Tween 20, twice with 100 μl of solution A (0.1 M  
135 RNase free NaOH, 0.05 M RNase free NaCl), and twice with 100 μl of solution B (0.1 M RNase  
136 free NaCl). Washed beads were resuspended in 2x B&W buffer [10 mM Tris-HCl (pH 7.5), 1  
137 mM EDTA, 2 M NaCl], with 20 units of RNase inhibitor (Enzymatics) and the RNA solution was  
138 added to the beads and incubated with rotation for 15 min at room temperature. After incubation,  
139 the beads were washed three times with 100 μl of 1x B&W buffer before resuspending the  
140 beads in 20 μl of 25 mM biotin in elution buffer (Omega BioTek). The beads were incubated at  
141 room temperature for 15 min with occasional mixing. After binding the beads to the magnet, the  
142 supernatant was collected. The elution process was repeated once for a final volume for 40 μl of

143 eluted RNA. cDNA was prepared using 5 μM of an Illumina-compatible primer complimentary to  
144 the 3'-linker, 20 ul of eluted RNA, and Protoscript II RT (NEB). 10 μl of cDNA was PCR  
145 amplified for 18 cycles with Illumina TruSeq primers and Phusion DNA polymerase. PCR  
146 reactions were purified with AMPure XP beads (Beckman Coulter). Indexed libraries were  
147 quantified by Qubit (Invitrogen). Library quality was assessed on a 4200 TapeStation System  
148 Instrument (Agilent Technologies) using a D100 ScreenTape assay, mixed to a final  
149 concentration of 1–10 nM and sequenced on an Illumina HiSeq in a 50 cycle run.

| Oligonucleotides             | Sequences                                                                               |
|------------------------------|-----------------------------------------------------------------------------------------|
| 3p-RNA linker (RNA oligo)    | 5' rNrNrNrNrNrNrNrNrArGrArUrCrGrGrArArGrArGrCrGrUrCrGrUrG/3'-desBIOTeg/                 |
| 5p-RNA linker (RNA oligo)    | /5' AmMC6/rGrUrGrArCrUrGrGrArGrUrUrCrArGrArCrGrUrGrUrGrCrUrCrUrUrCrCrGr rArUrC/3'-Phos/ |
| ILMN-RT                      | 5'-ACACGACGCTCTTCCGATCT-3'                                                              |
| TruSeq Universal PCR Forward | 5' AATGATACGGCGACCACCGAGATCTACACTCTTTCCCTACACGACGCTCTTCCGATCT-3'                        |
| TruSeq Indexed PCR Reverse   | 5' CAAGCAGAAGACGGCATAACGAGATCGGTNNNNNNGTGACTGGAGTTTCAGACGTGTGCTCTTCCGAT-3'              |

## 150 **Stranded RNAseq**

151 Total RNA was enriched for polyadenylated mRNA using oligo-dT magnetic beads (Ambion).  
152 cDNA was generated from the enriched polyA<sup>+</sup> mRNAs after fragmentation in 2.2x SuperScript  
153 IV reverse transcriptase buffer at 94°C for 3 min. After immediately cooling on ice, RT reaction  
154 with SuperScript IV RT (Thermo Fisher Scientific) was performed per manufacture's  
155 recommendations with 150 ng of random primers (Thermo Fisher Scientific) in 20 μl final  
156 volume. cDNA:RNA hybrids were purified using MyOne Silane beads (Thermo Fischer  
157 Scientific) per manufacture's recommendations and eluted in 18 μl of RNase free H<sub>2</sub>O. Second-  
158 strand cDNA was then generated using RNase H and *E. coli* DNA Polymerase (Enzymatics)  
159 with dUTP incorporation (1x NEB buffer 2, 100 μM dATP, dCTP, dGTP, 200 μM dUTP, 2.5 units  
160 of RNase H, 30 units of DNA polymerase) in 100 μl final volume at 15°C for 2.5 hrs. cDNA was



161 purified with Silane beads and eluted in 52  $\mu$ l of RNase free H<sub>2</sub>O as input for end repair reaction  
162 using End Repair Module (NEB) following manufacturer's recommendations. A-tailing reaction  
163 (50  $\mu$ l final volume) performed with Klenow fragment (minus 3'-5' exonuclease activity,  
164 Enzymatics) and end repaired Silane purified cDNA eluted in in 32  $\mu$ l of RNase free H<sub>2</sub>O (1x  
165 NEB buffer 2, 200  $\mu$ M dATP, 15 units Klenow fragment) at 37°C for 30 min. Reaction products  
166 were purified with 1.8x AMPure XP beads (Beckman Coulter) and eluted in 10  $\mu$ l of RNase free  
167 H<sub>2</sub>O. Purified cDNA was ligated to 40 nM of annealed Illumina TruSeq Universal adaptors in 50  
168  $\mu$ l final volume reaction for 30 min at 25°C (40 nM adaptors, 1X Rapid Ligation Buffer  
169 (Enzymatics), 3000 units of T4 DNA ligase (Enzymatics). Reaction products were purified with  
170 AMPure XP beads and eluted in 12  $\mu$ l of RNase free H<sub>2</sub>O. USER enzyme (NEB) was used to  
171 degrade the dUTP-containing strand by adding 1 unit of USER to purified cDNA and incubating  
172 for 30 min at 37°C. Reactions were used directly in PCR amplification with Illumina TruSeq  
173 primers and Phusion DNA polymerase with 10  $\mu$ l of input for 18 cycles. Libraries were size  
174 selected from 200 – 700 bp using AMPure XP beads, quantified by Qubit (Invitrogen), and  
175 mixed to a final concentration of 4 nM. Library quality was assessed on a 4200 TapeStation  
176 System Instrument (Agilent Technologies) using a D100 ScreenTape assay and sequenced on  
177 an Illumina NovaSEQ 6000 in a paired end 150 cycle run.

| Adaptors             | Sequences                                      |
|----------------------|------------------------------------------------|
| Illumina forward (F) | /5' -Phos/GATCGGAAGAGCTCGTATGCCGTCTTCTGCTTG-3' |
| Illumina reverse (R) | /5' - ACACTCTTTCCCTACACGACGCTCTTCCGATC*T-3'    |

## 178 **Computational analyses of next generation sequencing data**

### 179 *Processing and analysis of cyclic phosphate cDNA libraries*

180 Unique molecular identifier (UMI) sequences were extracted and added to FASTQ reads using  
181 UMI-tools (v0.5.4) (39). Only read 1 was used from the second experiment, to adhere with the

182 analysis process applied for experiment 1. FASTQ reads were then aligned to the MHV genome  
183 alone (GenBank accession: NC\_001846.1) and a combined reference including the MHV  
184 genome, *Mus musculus* rRNA and U6 snRNA references (GenBank accession numbers:  
185 NR\_003278.3, NR\_003279.1, NR\_003280.2, NC\_000074.6, NR\_003027.2), and annotated  
186 ORFs from the Mouse ORFeome collection (MGC full-cds collection for *Mus musculus*)  
187 using Bowtie version 2 (v2.3.2) (40). Aligned reads were de-duplicated using UMI-tools to  
188 remove PCR duplicated reads. De-duplicated reads were converted to bedGraph format using  
189 BEDTools (v2.26.0) to report the number of reads at each single base cleavage position,  
190 including for sense and antisense sequences for the MHV aligned reads (41). Reads at each  
191 cleavage position were normalized by library size.

192 To identify signal dependent on the presence of a specific endoribonuclease, normalized counts  
193 at each cleavage position in RNase L<sup>-/-</sup> or EndoU<sup>mut</sup> libraries were subtracted from the signal in  
194 libraries with wild type RNase L or EndoU activity, to remove signal that occurred in the absence  
195 of either endoribonuclease. The difference in cleavage activity at each position in the absence  
196 of RNase L or EndoU was determined by calculating the log<sub>2</sub> fold change. The frequency of  
197 cleavage at particular dinucleotides was determined by quantifying the sum of reads assigned to  
198 each of the 16 possible dinucleotides divided by total number of aligned reads in the library.  
199 Dinucleotide enrichment was determined by calculating the frequency of cleavage at each  
200 dinucleotide in the MHV genomic sequence and determining the log<sub>2</sub> fold enrichment of the  
201 observed (experimental) frequencies compared to the expected (background) frequencies.  
202 Significance of enrichment was calculated using the Fisher's exact test to compare the odds  
203 ratio of obtaining a specific dinucleotide in the expected data to the observed data.

#### 204 *RNAseq alignment, annotation, and differential expression analysis*

205 Illumina adaptor sequences were trimmed from FASTQ reads using Cutadapt (v 1.16) and  
206 sequences shorter than 20 nucleotides were discarded (42). Trimmed reads were aligned to a

207 combined MHV (GenBank accession: NC\_001846.1) and *Mus musculus* genome reference  
208 (Ensemble GRCm38.p6) and bedGraph coverage files were generated from each alignment  
209 using STAR (v 2.7.1a) (43). Read fragments were assigned and counted using featureCounts  
210 (from subread v 1.6.2) and a combined MHV and *Mus musculus* GTF (Ensemble GRCm38.p6)  
211 file for gene annotation (44). The MHV GTF file included the genomic positions of the combined  
212 ORF1a/b non-structural proteins and each of the structural and accessory proteins. Gene  
213 counts were normalized using DESeq2 media of ratios method to account for sequencing depth  
214 and RNA composition (45). For downstream differential expression analysis, trimmed reads  
215 were also aligned to the *Mus musculus* complete transcriptome reference (Gencode  
216 GRCm38.p6) using Salmon (v.0.14.1) (46). Transcript abundance files were used for differential  
217 expression analysis with DESeq2 after importing with tximport and counts normalized by the  
218 media of ratios method were used for data visualization (47). Genes with an FDR < 0.05 were  
219 called significant and used to generate volcano plots with the EnhancedVolcano package and z-  
220 transformed counts were used to generate heatmaps with the ComplexHeatmap package (48,  
221 49). For gene functional category enrichment analyses, topGO was used to determine  
222 significant enrichment (weightFish/p > 0.01) by using non-differentially expressed genes (< 2 or  
223 < -2 log<sub>2</sub> fold change and FDR < 0.01) as the background to determine the categories enriched  
224 in differentially expressed genes. topGO employs conditional enrichment analysis, which takes  
225 the nested structure of GO terms into account to reduce redundancy in enrichment results (50).

## 226 *Motif analysis*

227 To visualize the cleavage sequence preferences for RNase L and EndoU, the top 1% of  
228 either RNase L- or EndoU-dependent sites from subtractive analysis, as described above, were  
229 selected. Using BEDTools, 3 bps were added upstream and downstream of the selected  
230 positions and a FASTA file was generated from the 6-base pair sequences. Meme was used to  
231 determine the sequence preference enrichment and graphed using ggseqlogo (51, 52).

232 *UA scoring*

233 UA sequences in the MHV genome were designated as predominantly cleaved 3' of U  
234 (consistent with EndoU targeting) or A (consistent with RNase L targeting). All UA dinucleotides  
235 in the MHV genome with > 30 cyclic phosphate counts at either position of cleavage in the  
236 dinucleotide were selected and the ratio of normalized counts in each position was calculated  
237 (RNase L / EndoU). If the ratio was > 1, the position was scored as a UA<sup>↓</sup> site and if the ratio  
238 was < 1 the position was scored as a U<sup>↓</sup>A.

239 *Regional MHV cleavage analysis and abundance normalization*

240 The normalized counts in each MHV genomic region (all the genes and ORFs shown in Figure  
241 1A, in addition to the 5' and 3'-UTR and body TRS regions) were summed to calculate the total  
242 cyclic phosphate reads per region. Size correction was performed by dividing the sum of cyclic  
243 phosphate counts in each region by the length of the region in bases. To normalize the cyclic  
244 phosphate data by RNA abundance, stranded bedGraph files were generated from the bam files  
245 produced by STAR alignment of the RNAseq libraries. At each position with both cyclic  
246 phosphate and RNAseq data in the MHV genome, the cyclic phosphate counts were divided by  
247 the normalized (reads per million mapped reads) RNAseq counts to generate an abundance  
248 normalized cyclic phosphate value.

249 *TRS analysis*

250 In the above analyses, RNAseq reads mapping to the viral genome were not distinguished by  
251 alignment to genomic RNA or subgenomic mRNAs. To assign RNAseq reads to subgenomic  
252 mRNAs, we employed an analysis similar to that described in Irigoyen et al., 2016 (53) to  
253 identify leader/body chimeric reads (subgenomic mRNAs). We parsed the bam files generated  
254 from STAR alignment of the RNAseq libraries to the combined mouse and MHV genome for  
255 reads containing the 11 nucleotides of the leader sequence, UUUAAAUCUAA (GenBank  
256 accession: NC\_001846.1, nt 54 – 65) before the leader TRS sequence. The positions in the

257 reference where the read alignment starts and ends after the leader sequence were extracted to  
258 obtain an interval of alignment for the sequence downstream of the leader/body transition. The  
259 intervals for each chimeric read were intersected with the intervals of each canonical  
260 subgenomic mRNA using valr (54), with the requirement of at least 30 nt of overlap, to assign  
261 each chimeric read to an mRNA: 65 to 21746 (mRNA 1), 21747 to 23921 (mRNA 2), 23922 to  
262 27934 (mRNA 3), 27935 to 28317 (mRNA 4), 28318 to 28959 (mRNA 5), 28958 to 29654  
263 (mRNA 6), 29655 to 31334 (mRNA 7) (54). The number of reads assigned to each mRNA were  
264 counted and normalized to either the total sum of mRNAs per library or reads per million.

### 265 *SNP analysis*

266 Variant calling analysis was performed using bcftools (v1.9) to generate genotype likelihoods  
267 from the RNAseq bam files for MHV aligned reads, followed by SNP calling/indel calling to  
268 generate VCF files (55). The generated VCF files were filtered using bcftools with parameters -s  
269 LOWQUAL -e %QUAL<30 || DP>20' to identify low quality sites with less than 20 quality score  
270 or 30 base pairs of read depth.

### 271 **Data Deposition**

272 Raw and processed sequencing data are available at NCBI GEO: GSE147852.

### 273 **Bioinformatics Pipeline**

274 Code for all described analyses are available at <https://github.com/hesselberthlab/endoU> in the  
275 form of scripts, a data processing pipeline, and analysis package.

## 276 RESULTS

277 Products of cleavage by coronavirus EndoU have 2',3'-cyclic phosphate termini (1), effectively  
278 marking the location of cleavage within host and viral RNAs. Thus, in this study, we used cyclic  
279 phosphate cDNA sequencing to monitor the frequency and location of endoribonuclease  
280 cleavage sites in RNA from MHV-infected bone marrow-derived macrophage (BMM) (Fig. 1).  
281 Wildtype and mutant MHVs [wt MHV<sup>(V)</sup>, wt MHV<sup>(S)</sup>, PDE<sup>mut</sup>, and EndoU<sup>mut</sup>] along with BMM  
282 derived from wildtype and particular knockout C57BL/6 mice [WT, IFNAR<sup>-/-</sup> and RNase L<sup>-/-</sup> BMM]  
283 were used to distinguish between EndoU-dependent cleavage sites and RNase L-dependent  
284 cleavage sites (Fig. 1B). A pair of wt and mutant viruses derived from each isolate were used  
285 (Figs. 1A and 1B): wt MHV from Susan Weiss' lab designated MHV<sup>(S)</sup> and a phosphodiesterase  
286 mutant designated PDE<sup>mut</sup> (28-30, 38); wt MHV from Volker Thiel's lab designated MHV<sup>(V)</sup> and  
287 an EndoU mutant designated EndoU<sup>mut</sup> (26). Total cellular RNA was isolated from cells at 9 and  
288 12 hpi, times when coronavirus NS2 PDE and nsp15 EndoU activities prevent dsRNA-  
289 dependent antiviral responses (26), including the OAS/RNase L pathway (28-30). Under these  
290 experimental conditions (Fig. 1B), we expect that RNase L activity will be increased within  
291 PDE<sup>mut</sup>-infected and EndoU<sup>mut</sup>-infected WT BMM, as compared to MHV<sup>(S)</sup>-infected and MHV<sup>(V)</sup>-  
292 infected WT BMM. Furthermore, we expect that EndoU activity will be evident within MHV<sup>(S)</sup>-  
293 infected and MHV<sup>(V)</sup>-infected BMM, as compared to EndoU<sup>mut</sup>-infected BMM.

294 Cyclic phosphate cDNA libraries were prepared using total cellular RNA from 9 and 12 hpi (Fig.  
295 1C). The RNA ligase RtcB was used to ligate a 3' adaptor to RNA fragments containing a cyclic  
296 phosphate. The 3' adaptor has a biotin moiety and a unique molecular identifier to enumerate  
297 cleavage sites (56). A 5' adaptor was ligated to the RNA samples, followed by reverse  
298 transcription, PCR amplification and Illumina sequencing. Analysis of DNA sequences revealed  
299 the frequency and location of endoribonuclease cleavage sites in host and viral RNAs. Figures  
300 2-8 in the body of this manuscript correspond to data from the experiment outlined here (Fig. 1).

301 Replicate data from infections by wt and mutant MHV [wt MHV<sup>(S)</sup>, PDE<sup>mut</sup>, and EndoU<sup>mut</sup>] in wt  
302 and RNase L<sup>-/-</sup> BMM yield similar outcomes (Figures S8 and S9).

303 **Endoribonuclease cleavage sites in host and viral RNAs.** Endoribonuclease cleavage sites  
304 were detected in both host and viral RNAs (Fig. 2). The frequency of cleavage sites in individual  
305 RNAs was normalized to percent total cDNA reads in each library, allowing for quantitative  
306 comparisons between individual RNAs in each sample and between RNAs across distinct  
307 samples. The vast majority of cleavage sites were detected in MHV RNA, cellular mRNA and  
308 ribosomal RNAs (18S, 28S 5.8S and 5S rRNAs), with a smaller portion of cleavage sites in  
309 tRNAs and U6 snRNA (Fig. 2). We can attribute cleavage sites in cellular RNAs to specific  
310 endoribonucleases in some cases, but not others. For instance, U6 snRNA had 3'-terminal  
311 cyclic phosphates (Fig. S1A) attributed to the nucleolytic activity of C16orf57/USB1 (32, 57, 58).  
312 Ribosomal RNAs accounted for ~50-80% of the cleavage sites detected in each library (Fig. 2).  
313 The majority of cleavage sites within rRNAs are the result of unspecified endoribonucleases,  
314 along with some RNase L-dependent cleavage sites (31, 32), as described below. Cellular  
315 mRNAs accounted for ~5% of endoribonuclease cleavage sites in each cDNA library (Fig. 2);  
316 however, the numbers of cleavage sites within individual cellular mRNAs were too low to  
317 definitively attribute to one or another endoribonuclease.

318 Cleavage sites in MHV RNA were found predominantly in the positive-strand of viral RNA,  
319 ranging from 10% to 40% of all cleavage sites in each library (Fig. 2). Very few reads were  
320 detected in the MHV negative-strand RNA (Fig. S1B, S11C-D). As described below, we attribute  
321 cleavage sites in MHV RNA to specific endoribonucleases, including EndoU and RNase L.

322 In WT BMM, we captured more reads per library mapping to MHV RNA at 12 hpi as compared  
323 to 9 hpi, except in cells infected with EndoU<sup>mut</sup> MHV. However, in IFNAR<sup>-/-</sup> and RNase L<sup>-/-</sup> BMM,  
324 capture of MHV RNA was similar between 9 and 12 hpi (Fig 2). Across all cell types the relative  
325 amount of host RNAs captured at 9 and 12 hpi were similar and in agreement with capture

326 frequencies from uninfected and virus-infected cells previously reported (25, 26, 46). Data from  
327 an independent experiment revealed similar outcomes, with 10% to 30% of all cleavage sites in  
328 MHV RNA, 5% to 10% of cleavage sites in cellular mRNA and more than 60% of cleavage sites  
329 in ribosomal RNAs (Fig. S8A).

330 **Frequency, location and sequence specificity of cleavage sites in MHV RNA.** Metal-ion-  
331 independent endoribonucleases have characteristic specificities: e.g. RNase A family members  
332 (RNase 1-8) cleave RNA 3' of pyrimidines while RNase L cleaves RNA 3' of UpN<sup>↓</sup> dinucleotides  
333 (UA<sup>↓</sup>, UU<sup>↓</sup> > UG<sup>↓</sup>) (32, 59). EndoU is reported to cleave RNA 3' of pyrimidines in vitro (1, 8, 60);  
334 however, physiologically relevant targets of EndoU have not been defined.

335 We detected endoribonuclease cleavage sites throughout MHV RNA, under all experimental  
336 conditions (Fig. 3). The frequency of cleavage at each base of MHV RNA ranged from ~ 0.00 to  
337 0.2% of all cDNA reads in each library (Fig. 3, y-axis). Peaks of cleavage approaching 0.2% of  
338 all cDNA reads in each library (corresponding to 1 in 500 cleavage sites across all RNAs in  
339 each cDNA library) are present at particular sites in the N gene open reading frame, near the 3'  
340 terminus of MHV RNA (Fig. 3, WT BMM, PDE<sup>mut</sup> and EndoU<sup>mut</sup>). Typically, when measurable  
341 cleavage was detected at a particular base in MHV RNA at 9 hpi, measurable cleavage was  
342 also detected at that same site at 12 hpi, often with increased abundance (Fig. 3, overlapping  
343 orange and blue lines at each base for 9 and 12 hpi).

344 The sequence specificity of cleavage sites in MHV RNA revealed profound differences in the  
345 endoribonuclease activities present within WT BMM cells infected with WT and mutant viruses  
346 (Fig. 4). Distinct RNase L-dependent and EndoU-dependent cleavage specificities were evident  
347 (Fig. 4). The sequence specificity of endoribonuclease cleavage sites was assessed in two  
348 registers: positions -2 to -1 of cleavage (Fig. 4A, B and C) and positions -1 to +1 of cleavage  
349 (Fig. 4D, E and F). WT MHV RNA was cleaved 3' of pyrimidines in WT BMM [Fig. 4A, MHV<sup>(S)</sup>  
350 and MHV<sup>(V)</sup>], with a notable preference for cleavage between U<sup>↓</sup>A and C<sup>↓</sup>A sequences (Fig. 4D,



351 E and F). This pattern of pyrimidine specific cleavage between U $\downarrow$ A and C $\downarrow$ A sequences was  
352 lost in Endo<sup>mut</sup>-infected WT BMM (Fig. 4A and 4D). Similar patterns of cleavage were evident in  
353 an independent experiment (Fig. S8C-D).

354 Dinucleotide enrichment, a measurement comparing the frequency of cleavage at each  
355 dinucleotide to the frequency of each dinucleotide in the MHV genomic RNA, showed that U $\downarrow$ A  
356 and C $\downarrow$ A sequences were the only sequences with positively enriched cleavage in WT MHV-  
357 infected WT BMM (Fig. 4E, adjusted p-value (q) for fold change [ $\log_2(\text{experiment} / \text{control})$ ] of  
358  $<1 \times 10^{8***}$ ). Dinucleotide enrichment and de-enrichment data for all dinucleotides at 9 and 12 hpi  
359 are available as supplemental data (Tables S1 and S2). These data indicate that EndoU  
360 cleaved MHV RNA at U $\downarrow$ A and C $\downarrow$ A sequences.

361 RNase L activity was also evident within MHV-infected WT BMM (Fig. 4A, B and C). RNase L  
362 activity, with characteristic cleavage predominantly after UA $\downarrow$  and UU $\downarrow$  dinucleotides, was  
363 significantly increased in both PDE<sup>mut</sup>-infected and EndoU<sup>mut</sup>-infected WT BMM (Fig. 4A).  
364 Dinucleotide enrichment showed that UA $\downarrow$ , UU $\downarrow$  and UC $\downarrow$  sequences were positively enriched  
365 cleavage sites in PDE<sup>mut</sup>-infected and EndoU<sup>mut</sup>-infected WT BMM (Fig. 4B, adjusted p-value (q)  
366 for fold change [ $\log_2(\text{experiment} / \text{control})$ ] of  $<1 \times 10^{8***}$ ). In IFNAR<sup>-/-</sup> and RNase L<sup>-/-</sup> BMM, the  
367 robust cleavage at UA $\downarrow$ , UU $\downarrow$  and UC $\downarrow$  sequences decreased and pyrimidine specific cleavage  
368 dominated, especially in PDE<sup>mut</sup>-infected cells (Figs. S3A and S3B). These data indicate that  
369 RNase L cleaved MHV RNA after UA $\downarrow$ , UU $\downarrow$  and UC $\downarrow$  sequences, consistent with other studies  
370 (31, 32).

371 The distinct specificity of cleavage for RNase L (UA $\downarrow$ , UU $\downarrow$  and UC $\downarrow$  sequences) and EndoU  
372 (U $\downarrow$ A and C $\downarrow$ A sequences) allowed us to compare the relative amounts of each enzyme activity  
373 in the various experimental conditions. MHV RNAs were cleaved predominantly by EndoU  
374 activity within MHV<sup>(S)</sup>-infected and MHV<sup>(V)</sup>-infected BMM (Fig. 4A and D). MHV RNA was  
375 cleaved by both RNase L and EndoU activities within PDE<sup>mut</sup>-infected WT BMM while MHV RNA

376 was cleaved predominantly by RNase L activity within EndoU<sup>mut</sup>-infected WT BMM (Fig. 4A and  
377 D). The activation of RNase L within PDE<sup>mut</sup>-infected and EndoU<sup>mut</sup>-infected WT BMM was  
378 expected, as these viral proteins coordinately block the OAS-RNase L pathway (22, 26, 28, 29).  
379 Dinucleotide analysis of positions downstream from cleavage sites confirmed a strong  
380 preference for adenine 3' of the cleavage positions in MHV RNA in WT BMM (Figs. S2A and  
381 S2B). When EndoU was inactivated within EndoU<sup>mut</sup>-infected cells, the strong preference for  
382 adenine 3' of cleavage positions in MHV RNA was dramatically reduced, but not entirely  
383 eliminated in WT BMM (Fig. S2A), IFNAR<sup>-/-</sup> BMM (Fig. S3A) and RNase L<sup>-/-</sup> BMM (Fig. S3B).  
384 The residual cleavage of MHV RNA within EndoU<sup>mut</sup>-infected RNase L<sup>-/-</sup> BMM is likely due to  
385 angiogenin or another RNase A family member, as these enzymes are present within  
386 macrophage and they share a predilection for cleavage at U<sup>↓</sup>A and C<sup>↓</sup>A sequences (61-64).  
387 We identified cyclic phosphate cDNAs dependent on the presence of either RNase L or EndoU  
388 and then used fold-change to identify and assign specific sites as RNase L or EndoU targets  
389 (Fig. 3 and Fig. S4). We determined how many of these sites could be assigned to either  
390 endoribonuclease for each experimental condition (Fig 3). EndoU cleaved MHV RNA at both 9  
391 and 12 hpi in all three cell types, with increased amounts of cleavage at 12 hpi as compared to  
392 9 hpi (Fig. 3A, B and C). MHV RNA was cleaved by RNase L activity at both 9 and 12 hpi in WT  
393 BMM, with exacerbated amounts of RNase L activity in PDE<sup>mut</sup>-infected and EndoU<sup>mut</sup>-infected  
394 WT BMM, as expected. In EndoU<sup>mut</sup>-infected WT BMM, there were nearly equal numbers of  
395 cleavage sites assigned to RNase L at 9 and 12 hpi, which was not observed in any other  
396 condition (Fig. 3A). By comparison with WT BMM, less RNase L-dependent cleavage was  
397 detected in IFNAR<sup>-/-</sup> BMM (Fig. 3B), consistent with reduced OAS expression and reduced  
398 RNase L activity in IFNAR<sup>-/-</sup> BMM (65). Additionally, the number of sites assigned to EndoU in  
399 IFNAR<sup>-/-</sup> and RNase L<sup>-/-</sup> BMM was less than that observed in WT BMM, suggesting that EndoU  
400 activity was altered in the absence of IFN signaling and innate immune effectors (Fig. 3A and

401 3B). We attributed the majority of endoribonuclease cleavage sites within MHV RNA to either  
402 EndoU (U $\downarrow$ A and C $\downarrow$ A sequences) or RNase L (UA $\downarrow$ , UU $\downarrow$  and UC $\downarrow$  sequences) activities (Figs.  
403 3 and 4); however, undefined enzymes cleaved MHV RNA within EndoU<sup>mut</sup>-infected RNase L<sup>-/-</sup>  
404 BMM (Fig. 3C). As mentioned above, the residual cleavage of MHV RNA within EndoU<sup>mut</sup>-  
405 infected RNase L<sup>-/-</sup> BMM was likely due to angiogenin or another RNase A family member, as  
406 these enzymes are present within macrophage and they share a predilection for cleavage at  
407 U $\downarrow$ A and C $\downarrow$ A sequences (61-64). The patterns and amounts of EndoU-dependent and RNase  
408 L-dependent cleavage in MHV RNA were consistent from one experiment (Figs. 3 and 4) to  
409 another (Figs. S8B-S8F).

410 It is intriguing to note that EndoU and RNase L share a common substrate dinucleotide, UA.  
411 Furthermore, we can distinguish between cleavage of UA by EndoU and RNase L as these  
412 enzymes cleave the UA sequence at distinct sites: EndoU cleaves between U $\downarrow$ A sequences  
413 whereas RNase L cleaves after UA $\downarrow$  dinucleotides (Fig. 4H). We found hundreds of UA  
414 sequences in MHV RNA cleaved by both EndoU and RNase L (Fig. 4G). EndoU activity  
415 predominated in MHV<sup>(S)</sup>-infected and MHV<sup>(V)</sup>-infected WT BMM at 9 and 12 hpi (Fig. 4G, MHV<sup>(S)</sup>  
416 and MHV<sup>(V)</sup>). Yet in PDE<sup>mut</sup>-infected WT BMM, either EndoU or RNase L cleaved about half of  
417 the UA sequences that were targeted by both enzymes (Figs. 4G and S8F, PDE<sup>mut</sup>). EndoU  
418 cleaved to a greater extent about half of the shared sites whereas RNase L cleaved another half  
419 to a greater extent (Figs. 4G and S8F, PDE<sup>mut</sup>). Thus, while EndoU and RNase L have  
420 overlapping sequence specificity and share common UA targets within MHV RNAs, these  
421 enzymes do not tend to cleave the same molecule at the same site at any one moment in time.  
422 Our data show that the majority of cleavage of MHV RNA was from EndoU rather than RNase L  
423 during WT MHV infections (Figs. 4G and S8F, WT); however, when the MHV PDE was mutated,  
424 a much larger proportion of cleavage events in viral RNA were from RNase L (Figs. 4G and S8F,  
425 PDE<sup>mut</sup>).

426 Taken together, these data indicate that EndoU and RNase L cleaved MHV RNA within infected  
427 BMMs. The majority of endoribonuclease cleavage sites within MHV RNA were attributed to  
428 either EndoU (U $\downarrow$ A and C $\downarrow$ A sequences) or RNase L (UA $\downarrow$ , UU $\downarrow$  and UC $\downarrow$  sequences) activities  
429 (Figs. 3 and 4). However, data from EndoU<sup>mut</sup>-infected RNase L<sup>-/-</sup> BMM (Fig. 3C) indicate that  
430 viral RNA was cleaved by other undefined endoribonucleases as well. Furthermore, when MHV  
431 NS2 PDE or nsp15 EndoU were inactivated by mutations, RNase L activity was much greater,  
432 with increased cleavage of MHV RNA by RNase L. Thus, both MHV NS2 PDE and nsp15  
433 EndoU activities prevent MHV RNA cleavage by the dsRNA-activated OAS/RNase L pathway,  
434 confirming our previous reports (26, 28, 29).

435 **RNase L-dependent and EndoU-dependent cleavage sites in MHV RNA.** A fold-change  
436 analysis was used to compare the magnitudes of RNase L-dependent and EndoU-dependent  
437 cleavage at each base of MHV RNA across experimental conditions (Fig. 5A). By subtracting  
438 endoribonuclease cleavage events detected for each virus in RNase L<sup>-/-</sup> BMM, we identified the  
439 top 100 RNase L-dependent cleavage sites in MHV RNA (Fig. 5B). By subtracting the  
440 endoribonuclease cleavage events detected for the EndoU<sup>mut</sup>, we identified the top 100 EndoU-  
441 dependent cleavage sites in MHV RNA (Fig. 5C).

442 RNase L-dependent sites in MHV RNA were cleaved at the greatest magnitudes in PDE<sup>mut</sup>-  
443 infected and EndoU<sup>mut</sup>-infected WT BMM (Fig. 5B). RNase L-dependent cleavage of MHV RNA  
444 was substantially lower in IFNAR<sup>-/-</sup> cells, as expected (65), especially that associated with  
445 infections by the PDE<sup>mut</sup> and EndoU<sup>mut</sup> (Fig. 5B). The top 15 RNase L-dependent cleavage sites  
446 in MHV RNA were at UA $\downarrow$ , UU $\downarrow$  and UG $\downarrow$  dinucleotides distributed across the viral genome, with  
447 a clustering of sites within the first 2/3 of the genome (Fig. 5D). Magnitudes of cleavage at each  
448 of these sites ranged from 0.05 to 0.08% of all cleavage sites in each cDNA library (~1/2000  
449 cleavage sites in the cDNA library). Together, these top 15 cleavage sites in MHV RNA  
450 accounted for ~1% of all cleavage sites in this cDNA library, across all host and viral RNAs.

451 These data indicate that RNase L cleaved coronavirus RNA most efficiently at a relatively small  
452 number of sites in the viral genome.

453 EndoU-dependent cleavage sites in MHV RNA were evident in WT, IFNAR<sup>-/-</sup> and RNase L<sup>-/-</sup>  
454 BMMs; however, EndoU cleaved MHV RNA to a greater extent in WT BMM (Fig. 5C). Subdued  
455 magnitudes of EndoU-dependent cleavage of MHV RNA were observed at 12 hpi in IFNAR<sup>-/-</sup>  
456 and RNase L<sup>-/-</sup> cells, as compared to WT BMM, suggesting a potential functional interaction  
457 between EndoU and dsRNA-activated host responses, or RNase L in particular. Additionally,  
458 most of the sites with EndoU-dependent cleavage activity had similar magnitudes of change,  
459 leading to a uniform distribution of sites across all conditions, excluding a few outliers. The top  
460 15 EndoU-dependent cleavage sites in MHV RNA were at C<sup>↓</sup>A and U<sup>↓</sup>A sequences distributed  
461 to a greater extent in the last 2/3 of the viral genome (Fig. 5E).

462 We examined the cumulative distribution of cleavage in MHV RNA, across all conditions (Figs.  
463 5F and S8E). In this analysis, we plotted the overall accumulation of cyclic phosphate reads as  
464 a function of position along the MHV genomic RNA (Figs. 5F and S8E). Because RNase L-  
465 dependent cleavage sites (Fig. 5D) and EndoU-dependent cleavage sites (Fig. 5E) were  
466 distributed across the MHV RNA genome in WT BMM, cumulative cleavage increased from 0%  
467 at the 5' end of the genome to 100% at the 3' end of the genome, with a slope of ~45° for  
468 MHV<sup>(S)</sup> and MHV<sup>(V)</sup> in WT BMM [Fig. 5F, WT BMM, green and blue lines for MHV<sup>(S)</sup> and MHV<sup>(V)</sup>].  
469 In EndoU<sup>mut</sup>-infected WT BMM, cleavage of MHV RNA increased in the ORF1a and ORF1b  
470 regions of the genome as compared to MHV<sup>(S)</sup> and MHV<sup>(V)</sup>, shifting the slope of cumulative  
471 cleavage to the left (Fig. 5F, WT BMM, red line for EndoU<sup>mut</sup>). In contrast, when both EndoU and  
472 RNase L activities were absent, as in EndoU<sup>mut</sup>-infected RNase L<sup>-/-</sup> BMM, cleavage of MHV  
473 RNA was substantially reduced across most of the genome, with a spike of EndoU- and RNase  
474 L-independent cleavage near the 3' UTR (Fig. 5F, RNase L<sup>-/-</sup> BMM, red line for EndoU<sup>mut</sup>). Note  
475 how the slope of the line for EndoU<sup>mut</sup> goes from ~50% to 100% of cumulative cleavage

476 between nucleotides 30,000 and 31,344. This indicates that endoribonucleolytic cleavage was  
477 much more pronounced near the 3' terminus of MHV RNA in EndoU<sup>mut</sup>-infected IFNAR<sup>-/-</sup> and  
478 RNase L<sup>-/-</sup> BMM, as compared to WT BMM. These data indicate that EndoU<sup>mut</sup> MHV RNA was  
479 cleaved at very different magnitudes from one end to the other in WT BMM versus that in  
480 RNase L<sup>-/-</sup> BMM, with increased relative amounts of cleavage between nts 1-20,000 in WT BMM,  
481 less cleavage between nts 1-30,000 in RNase L<sup>-/-</sup> BMM, and a spike in cumulative cleavage  
482 near the 3' terminus in RNase L<sup>-/-</sup> BMM.

483 These data also indicate that EndoU and RNase L account for a substantial amount of the  
484 cumulative cleavage in the orf1a and orf1b regions of the MHV RNA genome. MHV RNA was  
485 cleaved to a greater extent within orf1a and orf1b in WT BMM, especially when EndoU was  
486 disabled (Fig. 5F, red line for EndoU<sup>mut</sup> shifts to the left in WT BMM). Conversely, MHV RNA  
487 was cleaved to a lower extent within orf1a and orf1b in RNase L<sup>-/-</sup> BMM, especially when EndoU  
488 was disabled (Fig. 5F, red line for EndoU<sup>mut</sup> shifts to the right in RNase L<sup>-/-</sup> BMM). When EndoU  
489 and RNase L activities were absent, as in EndoU<sup>mut</sup>-infected RNase L<sup>-/-</sup> BMM, the residual  
490 cleavage of MHV RNA by unspecified endoribonucleases occurred predominantly near the 3'  
491 terminus of the viral genome.

492 **Endoribonuclease cleavage sites in distinct MHV RNA sequences and structures.** We  
493 next examined the frequency of endoribonuclease cleavage in distinct regions of MHV RNA  
494 (Figs. 6 and S7). The cumulative amounts of cleavage in each region of MHV RNA were plotted  
495 unadjusted (Fig. 6A) or adjusted for both RNA abundance and size (Fig. 6B). In supplemental  
496 data we show cleavage adjusted for RNA abundance alone (Fig. S7A) or size alone (Fig. S7B).  
497 Cleavage was detected in every region of MHV RNA, from the 5' NTR to the 3' NTR, including  
498 relatively small TRS sequences (Figs. 6A and 6B). The vast majority of cleavage events  
499 occurred in 1a/1b, S and N open reading frames (Fig. 6A). When adjusted for MHV RNA  
500 abundance, cleavage was most frequent in the ORF 1a/1b region and the ns2, HE and S ORFs

501 (S7A). Furthermore, with adjustments for size and abundance (Figs. 6B), one can see that  
502 each of the TRS elements was targeted for cleavage at frequencies similar to that observed in  
503 Orf1a/1b. Thus, although TRS sequences are quite small, they were cleaved just as frequently  
504 as RNA sequences in other regions of MHV RNA. Intriguingly, TRS6 was targeted more  
505 frequently (by EndoU) than other regions of MHV RNA, including other TRS elements (Fig. 6C).  
506 TRS6, with a UCCAAAC sequence, is distinct from other TRS elements, which possess  
507 UC $\downarrow$ AAAC sequences. We detected the most robust EndoU-dependent cleavages at C $\downarrow$ A and  
508 U $\downarrow$ A dinucleotides of TRS elements 4, 6, and 7 (Fig. 6C). In TRS elements 4 and 6, cleavage at  
509 the very 3'-end of the TRS sequence was dependent on the presence of a downstream adenine  
510 outside of the TRS sequence (Fig. 6C). Interestingly, the upstream C $\downarrow$ A cleavage site in TRS 6  
511 (Fig. 6C) relies on one of the single nucleotide polymorphisms (28960 T > C) that we detected  
512 in the viral genomes (Table S3). In vitro studies using purified EndoU show cleavage of a U $\downarrow$ A  
513 dinucleotide within a TRS substrate (23). Our data indicate that C $\downarrow$ A and U $\downarrow$ A dinucleotides of  
514 TRS elements are physiologic targets of EndoU.

515 RNAseq was used to measure the abundance of MHV RNA in all experimental conditions (Figs.  
516 S5 and 6D). MHV RNA was abundant in all samples from virus-infected cells, with similar  
517 amounts of MHV RNA across conditions, but for EndoU<sup>mut</sup>-infected WT BMM at 9 and 12 hpi  
518 (Fig. S5A). Decreased amounts of EndoU<sup>mut</sup> RNA in WT BMM (Fig. S5A) correlated with  
519 decreased virus replication in EndoU<sup>mut</sup>-infected WT BMM at 9 and 12 hpi (26). RNAseq reads  
520 were detected across the MHV RNA genome, with the most abundant reads corresponding to  
521 leader sequences at the 5' end of the genome and sg mRNA sequences at the 3' end of the  
522 genome (Fig. S5B). Consistent with published studies (53), MHV mRNA7 was most abundant,  
523 accounting for 70 to 80% of MHV mRNAs (Figs. 6D and S9C). MHV mRNAs 1-7 were present  
524 in all conditions, with some changes in relative amounts from one condition to another (Figs. 6D  
525 and S9C). MHV mRNA1 (genomic RNA) was increased proportionally to other MHV mRNAs in

526 EndoU<sup>mut</sup>-infected WT BMM at 12 hpi. MHV mRNA 7 was increased relative to other MHV  
527 mRNAs at 12 hpi in EndoU<sup>mut</sup>-infected IFNAR<sup>-/-</sup> BMM and RNase L<sup>-/-</sup> BMM. Remarkably, MHV  
528 RNA abundance did not correlate with the frequency of cyclic phosphate reads in viral RNA  
529 (Figs. S11A & S11B). Altogether, these data indicate that MHV RNA replication was able to  
530 produce each of the MHV mRNAs in proportional amounts, despite considerable changes in  
531 endoribonuclease activity from one condition to another.

532 Endoribonuclease cleavage sites were detected in functional RNA sequences and structures,  
533 including the Orf1a/1b frameshift element and the MHV 3' NTR (Fig. 7). The Orf1a/1b frameshift  
534 element contains both RNase L-dependent and EndoU-dependent cleavage sites (Figs. 7A and  
535 7B). Likewise, the MHV 3' NTR contains both RNase L-dependent and EndoU-dependent  
536 cleavage sites (Fig. 7C). The MHV 3' NTR spans nucleotide 31034, adjacent to the N stop  
537 codon, to nucleotide 31334, adjacent to the poly(A) tail (Fig. 7C). Functional RNA sequences  
538 and structures within the 3' NTR include an essential bulged stem-loop (nts 31034-31100), an  
539 essential pseudoknot (nts 31101-31150), a non-essential hypervariable region (HVR) (nts  
540 31179-31288), a polyadenylation signal (nts 31293-31298) and a poly(A) tail (66-68). A number  
541 of EndoU-dependent cleavage sites were detected within the 3' NTR, including prominent  
542 cleavage sites immediately adjacent to the poly(A) tail (Fig. 7C, <sup>31332</sup>C $\downarrow$ AC $\downarrow$ A<sup>31335</sup>). Together,  
543 these two cleavage sites account for ~0.15% of all cleavage sites in the cDNA library for the WT  
544 MHV in WT BMM at 12 hpi, corresponding to ~1/677 cleavage sites in the entire cDNA library.

545 When EndoU was inactivated by an H277A mutation, the cleavage of MHV RNA at the  
546 <sup>31332</sup>C $\downarrow$ AC $\downarrow$ A<sup>31335</sup> sequences adjacent to the poly(A) tail was dramatically reduced, but not  
547 entirely eliminated, in WT BMM (Fig. S6A). Furthermore, there was EndoU-independent  
548 cleavage of MHV RNA at the <sup>31332</sup>C $\downarrow$ AC $\downarrow$ A<sup>31335</sup> sequence in IFNAR<sup>-/-</sup> BMM (Fig. S6B) and  
549 RNase L<sup>-/-</sup> BMM (Fig. S6C). Cleavage of MHV RNA at the <sup>31332</sup>C $\downarrow$ AC $\downarrow$ A<sup>31335</sup> sequences adjacent  
550 to the poly(A) tail were notable whether unadjusted (Fig. S6A-C) or adjusted for RNA



551 abundance (Fig. S6D-F). These data indicate that the <sup>31332</sup>C $\downarrow$ AC $\downarrow$ A<sup>31335</sup> sequence in MHV RNA  
552 was susceptible to both EndoU-dependent and EndoU-independent cleavage. The EndoU-  
553 dependent cleavage of the <sup>31332</sup>C $\downarrow$ AC $\downarrow$ A<sup>31335</sup> sequence in MHV RNA was substantially greater  
554 than the EndoU-independent cleavage in WT BMM (Fig. S6A); however, substantial amounts of  
555 EndoU-independent cleavage were detected at the <sup>31332</sup>C $\downarrow$ AC $\downarrow$ A<sup>31335</sup> sequence in IFNAR<sup>-/-</sup> BMM  
556 (Fig. S6B) and RNase L<sup>-/-</sup> BMM (Fig. S6C).

557 **Cleavage of rRNA and changes in host gene expression.** Because RNase L cleaves 18S  
558 rRNA at specific sites in human cells (31, 32), we examined RNase L-dependent cleavage of  
559 18S rRNA within MHV-infected murine BMMs (Figs. 8A, 8B and S10). A fold-change analysis  
560 was used to compare the magnitudes of RNase L-dependent cleavage at each base of 18S  
561 rRNA across experimental conditions (Fig. 8A). By subtracting endoribonuclease cleavage  
562 events detected for each virus in RNase L<sup>-/-</sup> BMM, we identified the top 100 potential RNase L-  
563 dependent cleavage sites in MHV RNA (Fig. 8B). Four RNase L-dependent cleavage sites were  
564 clearly evident in 18S rRNA: UU<sup>542</sup>, UU<sup>543</sup>, UU<sup>771</sup> and UA<sup>772</sup>. These sites, on the surface of 18S  
565 ribosomal subunits, are analogous to RNase L-dependent cleavage sites in human 18S  
566 subunits (31, 32). 18S rRNA was cleaved at these sites to a significant magnitude in PDE<sup>mut</sup>-  
567 infected and EndoU<sup>mut</sup>-infected WT BMM (Figs. 8A, 8B and S10). 18S rRNA was not cleaved at  
568 significant magnitudes within mock-infected BMM nor in IFNAR<sup>-/-</sup> or RNase L<sup>-/-</sup> BMM (Fig. 8A  
569 and 8B). Thus, as in human cells (31, 32), RNase L targets 18S rRNA for cleavage at precise  
570 sites in murine cells. Furthermore, RNase L activity was specifically increased within PDE<sup>mut</sup>-  
571 infected and EndoU<sup>mut</sup>-infected WT BMM, as compared to MHV<sup>(S)</sup>-infected and MHV<sup>(V)</sup>-infected  
572 WT BMM (Fig. 8A and 8B). Although RNase L-dependent cleavage sites in rRNA were easily  
573 detected (Figs. 8A, 8B and S10), EndoU-dependent cleavage sites in rRNA were not detected  
574 (Fig. S10B). These data show the dsRNA-dependent OAS/RNase L pathway was significantly  
575 activated in PDE<sup>mut</sup>- and EndoU<sup>mut</sup>-infected WT BMM, and exclude rRNAs as targets of EndoU.

576 dsRNA-dependent host gene expression was also increased within MHV-infected WT BMM (Fig.  
577 8C-E). We used a Volcano plot (Fig. 8C) and gene ontology (GO) analyses to classify the  
578 nature of host gene expression within MHV-infected WT BMM (Fig. 8D and 8E) (49, 50). The  
579 Volcano plot shows the expression of many genes increasing by 2<sup>2</sup> to 2<sup>10</sup>-fold / 4-fold to 1024-  
580 fold (Fig. 8C). Increased gene expression in MHV<sup>(S)</sup>-infected WT BMM corresponded to a  
581 number of biological processes: negative regulation of apoptosis, LPS-activated gene  
582 expression, positive regulation of GTPase activity and IFN-gamma activated gene expression  
583 (Fig. 8D). Increased gene expression in EndoU<sup>mut</sup>-infected WT BMM (Fig. S12A and S12B)  
584 corresponded to some of these same groups of host genes, with a notable addition, response to  
585 exogenous dsRNA (Fig. 8E). Thus, GO analysis indicated that host gene expression associated  
586 with response to exogenous dsRNA was specifically activated in EndoU<sup>mut</sup>-infected WT BMM,  
587 as compared to MHV<sup>(S)</sup>-infected WT BMM (Fig. 8D and 8E).

588 Because GO analysis implicated “response to exogenous dsRNA”, we examined the  
589 magnitudes of expression for each host gene in this gene ontology group: GM13272, GM13283,  
590 IFN-alpha genes, IFN-beta, IFN-Z, Nfkbia, Nod2, Ripk2 and Tlr3 (Fig. 8E). We compared  
591 magnitudes of expression in mock-infected, MHV<sup>(S)</sup>-infected, MHV<sup>(V)</sup>-infected, PDE<sup>mut</sup>-infected  
592 and EndoU<sup>mut</sup>-infected WT BMM (Fig. 8E). Host gene expression associated with response to  
593 dsRNA increased by 100- to 1000-fold in MHV-infected WT BMM as compared to mock-infected  
594 cells, with even larger 1000- to 10,000-fold increases in EndoU<sup>mut</sup>-infected WT BMM (Fig. 8E).  
595 Thus, host genes associated with response to dsRNA were notably increased in MHV-infected  
596 BMM, with the greatest increases occurring within EndoU<sup>mut</sup>-infected WT BMM (Fig. 8E). Genes  
597 upregulated or downregulated in MHV<sup>(S)</sup>-infected cells did not vary substantially between WT  
598 and RNase L<sup>-/-</sup> BMM (Fig. 8F and 8G). Altogether, these data indicate that dsRNA-dependent  
599 host responses were exacerbated within MHV-infected cells, especially in EndoU<sup>mut</sup>-infected WT  
600 BMM. These data are consistent with recent studies from the Baker lab (69).

601 **Cellular endoribonucleases.** The residual cleavage of MHV RNA within EndoU<sup>mut</sup>-infected  
602 RNase L<sup>-/-</sup> BMM provoked our consideration of other cellular endoribonucleases. We  
603 hypothesized that residual pyrimidine specific cleavage of MHV RNA might be due to one or  
604 another RNase A family enzyme (63). We also considered T2 endoribonucleases based on their  
605 reported contributions to TLR8 activation (70). Consequently, we examined the expression of  
606 RNases 4 and 5 (angiogenin) and RNases T2A and T2B (Fig. S12C). Changes in magnitudes of  
607 RNase 4 and 5 expression were observed, with ~10-fold decreased expression in MHV<sup>(S)</sup>-  
608 infected and MHV<sup>(V)</sup>-infected WT BMM as compared to Mock-infected WT BMM (Fig. S12C).  
609 Decreased expression of RNases 4 and 5 was not as strong in PDE<sup>mut</sup>-infected WT BMM, and  
610 very little decrease in expression was observed in EndoU<sup>mut</sup>-infected WT BMM. Similar changes  
611 in expression of RNases 4 and 5 were observed in IFNAR<sup>-/-</sup> BMM and RNase L<sup>-/-</sup> BMM, with  
612 significantly decreased expression in MHV<sup>(S)</sup>-infected and MHV<sup>(V)</sup>-infected cells and a more  
613 limited decrease in EndoU<sup>mut</sup>-infected cells (Fig. S12C). Because RNases 4 and 5 share a  
614 complex dual promoter (71), with alternative splicing leading to the expression of either RNase 4  
615 or RNase 5, coordinate increases and decreases in their expression was not unexpected.  
616 These data reinforce our suspicion regarding the residual pyrimidine specific cleavage of MHV  
617 RNA within EndoU<sup>mut</sup>-infected RNase L<sup>-/-</sup> BMM.

618 In contrast to expression of RNase 4 and 5, changes in magnitudes of expression of RNases  
619 T2A and T2B were relatively small within MHV-infected cells, with a tendency for slightly  
620 increased expression (Fig. S12C). RNase T2 cleaves RNA within endosomes and lysosomes,  
621 targeting purine:uridine dinucleotides, R<sup>ψ</sup>U (70). The residual purine specific cleavage of MHV  
622 RNA within EndoU<sup>mut</sup>-infected RNase L<sup>-/-</sup> BMM might be associated with RNase T2 activity;  
623 however, our experiments do not definitively address this possibility.

## 624 **DISCUSSION**

625 We address a key question in the coronavirus field (72): What is the natural target of EndoU?  
626 Coronavirus EndoU prevents dsRNA-activated antiviral responses in infected cells (26);  
627 however, it is not clear how EndoU does this because its physiologic RNA substrates are  
628 unknown. In this study, we used MHV-infected bone marrow-derived macrophage (BMM) and  
629 cyclic phosphate cDNA sequencing to identify the RNA targets of EndoU.

630 We found that EndoU targeted MHV RNA within infected cells, cleaving viral RNA on the 3' side  
631 of pyrimidines with a strong preference for cleavage between U<sup>↓</sup>A and C<sup>↓</sup>A sequences  
632 (endoY<sup>↓</sup>A) (Fig. 4). This cleavage specificity from MHV-infected cells is consistent with that of  
633 purified EndoU (23, 60) and RNase A (61, 62), enzymes that are functionally and structurally  
634 related to one another (7). EndoU cleavage was detected in every region of MHV RNA, from  
635 the 5' NTR to the 3' NTR, including relatively small TRS sequences (Figs. 5E, 6 and 7).

636 Because MHV RNA is a template for both viral mRNA translation and viral RNA replication,  
637 cleavage by EndoU could inhibit both of these biosynthetic processes (Fig. 9). Intriguingly, MHV  
638 TRS sequences contain EndoU target sequences (C<sup>↓</sup>A and U<sup>↓</sup>A sequences) (Fig. 6C). TRS6,  
639 which was targeted more frequently by EndoU than other TRS elements, contains a C<sup>↓</sup>A target  
640 sequence rather than a U<sup>↓</sup>A sequence. We postulate that EndoU cleaves MHV RNA in a  
641 regulated manner, to inhibit negative-strand RNA synthesis, thereby preventing the  
642 accumulation of viral dsRNA (Fig. 9). Nsp16 (2' O-MT) could regulate EndoU-mediated  
643 cleavage of MHV RNA by methylating C<sup>↓</sup>A and U<sup>↓</sup>A sequences (1).

644 **How does EndoU inhibit double-stranded RNA-activated antiviral responses?** Coronavirus  
645 EndoU prevents the activation of multiple host dsRNA sensors, including MDA5, OAS and PKR  
646 (22, 26, 27). dsRNA-activated OAS/RNase L and PKR pathways restrict the replication of  
647 EndoU-deficient coronaviruses (26). Because EndoU<sup>mut</sup>-infected cells had increased  
648 accumulation of dsRNA, Kindler and colleagues (26) concluded that EndoU functions as a viral

649 RNA decay pathway to evade dsRNA-activated antiviral host cell responses. Consistent with  
650 this idea, Hackbart et al. (73) report that EndoU targets poly(U) sequences at the 5' end of viral  
651 negative-strand RNA. Another report suggests that EndoU might control the localization of viral  
652 dsRNA within cells, perhaps maintaining dsRNA within membranous RNA replication complexes  
653 (22). Our data suggest a third possibility, that EndoU targets MHV RNA to prevent the synthesis  
654 of dsRNA (Fig. 9): EndoU-dependent cleavages were detected throughout the genomic RNA  
655 (Figs. 5E, 6 and 7), indicating that EndoU destroys the template for negative-strand RNA  
656 synthesis, precluding the formation of dsRNA, rather than acting on dsRNA. Cyclic phosphate  
657 cDNA sequencing detected large amounts of cleavage in MHV (+) strand (Fig. 2 and Fig. 8SA)  
658 and vanishing little cleavage in MHV (-) strand (Figs. S1B, S11C-D). Cyclic phosphate cDNA  
659 sequencing can readily detect cleavage sites in both (+) and (-) strands of viral RNA (31, 32);  
660 however, cleavage of poly(U) sequences at the 5' end of MHV negative-strand RNA cannot be  
661 detected because the resulting cyclic phosphate RNA fragments are too small (<20 bases long)  
662 and they are homopolymeric, preventing detection by our sequencing and bioinformatics  
663 pipelines. While it is possible that EndoU targets poly(U) sequences, the specificity of EndoU for  
664 C<sup>ψ</sup>A and U<sup>ψ</sup>A sequences in vivo (Fig. 4) is inconsistent with poly(U) substrates being  
665 physiologically relevant. Furthermore, purified EndoU (60) and RNase A (61, 62) readily target  
666 UA sequences within heteropolymeric substrates. Thus, we conclude that EndoU targets MHV  
667 (+) strand RNA to prevent the synthesis of dsRNA (Fig. 9). Nonetheless, potential RNA  
668 substrates in (+) and (-) strands are not mutually exclusive. EndoU-dependent cleavage of the  
669 CACA sequences at the 3' end of the (+) strand and the poly(U) at the 5' end of the (-) strand  
670 could occur coordinately, as both are co-localized adjacent to one another at the same end of  
671 dsRNA products. When EndoU was mutated, we detected the activation of the dsRNA-  
672 dependent OAS/RNase L pathway (Figs. 4, 5 and 8) and increased host gene expression  
673 associated with response to dsRNA (Figs. 8D and 8E). These data, like other reports (22, 26, 27,  
674 69), indicate EndoU prevents the activation of dsRNA sensors.

675 EndoU cleaved MHV RNA in every region of the genome (Figs. 5E, 6 & 7). Because MHV RNA  
676 is a template for both viral mRNA translation and viral RNA replication, cleavage by EndoU  
677 could inhibit both of these biosynthetic processes (Fig. 9). Cleavage of the viral genome would  
678 prevent the expression of the viral replicase. Coronavirus RNA synthesis requires ongoing  
679 expression of the viral replicase, with negative-strand RNA synthesis being most dependent on  
680 new replicase expression (74). Substantial amounts of EndoU-dependent cleavage were  
681 detected in orfs 1a and 1b, especially within WT BMM (Fig. 5), potentially limiting the expression  
682 of replicase. Cleavage of MHV genomic RNA, the template for both genomic and subgenomic  
683 negative-strand RNA synthesis (10), would also prevent the synthesis of dsRNA products (Fig.  
684 9). EndoU-mediated cleavage of the tandem CA sequences adjacent to the MHV RNA poly(A)  
685 tail is most intriguing in this regard (Figs. 7C and S6). The CA sequences adjacent to the MHV  
686 RNA poly(A) tail are conserved in group 2 coronaviruses, present in both genomic and sg  
687 mRNAs, and positioned adjacent to the poly(A) template used for the initiation of negative-  
688 strand RNA synthesis (68). The coronavirus polymerase, nsp12, with nsp7 and 8 cofactors (75),  
689 initiates negative-strand RNA synthesis on the poly(A) tail of genomic RNA, leading to the  
690 synthesis of poly(U) at the 5' end of negative-strand RNA. Because coronavirus nsp12 is a  
691 primer-dependent RNA polymerase (76), nsp8 is thought to prime negative-strand RNA  
692 synthesis (77), making a poly(U) product from the poly(A) tail of genomic RNA templates (16).  
693 Cleavage of the tandem CA sequences adjacent to the MHV RNA poly(A) tail would disrupt  
694 negative-strand RNA synthesis at the point of initiation. This provides a theoretically appealing  
695 mechanism for EndoU and other endoribonucleases to prevent the synthesis of dsRNA (Fig. 9).  
696 MHV RNA was cleaved by one or more unspecified endoribonucleases in EndoU<sup>mut</sup>-infected  
697 RNase L<sup>-/-</sup> BMM. Thus, in addition to EndoU- and RNase L-dependent cleavage of MHV RNA,  
698 we observed EndoU- and RNase L-independent cleavage of MHV RNA (Fig. 2 and Fig. S8). By  
699 using fold-change analyses between wt and mutant conditions, we attributed the majority of

700 endoribonucleolytic cleavage sites in MHV RNA to EndoU activity and RNase L activity (Fig. 5);  
701 however, a substantial amount of cleavage in MHV RNA persisted in EndoU<sup>mut</sup>-infected RNase  
702 L<sup>-/-</sup> BMM (Fig. 2, EndoU<sup>mut</sup>, red bars). More than 5% of the cyclic phosphates in EndoU<sup>mut</sup>-  
703 infected RNase L<sup>-/-</sup> BMM RNA samples were in MHV RNA (Fig. 2, EndoU<sup>mut</sup>, red bars). This  
704 EndoU- and RNase L-independent cleavage of MHV RNA occurred predominantly at UA and  
705 CA dinucleotides (Fig. 4D); especially within IFNAR<sup>-/-</sup> (Fig. S3A, Position -1 to +1) and RNase L<sup>-/-</sup>  
706 (Fig. S3B, Position -1 to +1) BMM. Thus, the EndoU- and RNase L-independent cleavage of  
707 MHV RNA exhibited a nucleotide specificity similar to that of EndoU-dependent cleavage. It is  
708 possible that the H277A mutation in EndoU fails to completely inhibit endoribonuclease activity;  
709 however, we suspect that RNase A family members are responsible for this residual EndoU-  
710 independent cleavage of MHV RNA at U $\downarrow$ A and C $\downarrow$ A sequences. RNase A family enzymes are  
711 expressed in macrophage (63) and they cleave RNA at U $\downarrow$ A and C $\downarrow$ A sequences (62, 64).  
712 EndoU-independent cleavage of MHV RNA at the <sup>31332</sup>C $\downarrow$ AC $\downarrow$ A<sup>31335</sup> sequence was evident in  
713 WT BMM (Fig. S6A), IFNAR<sup>-/-</sup> BMM (Fig. S6B) and RNase L<sup>-/-</sup> BMM (Fig. S6C). The expression  
714 of RNases 4 and 5 (Fig. S12C) is consistent with residual cleavage at the <sup>31332</sup>C $\downarrow$ AC $\downarrow$ A<sup>31335</sup>  
715 sequences in EndoU<sup>mut</sup>-infected BMM (Fig. S6). These data indicate that the <sup>31332</sup>C $\downarrow$ AC $\downarrow$ A<sup>31335</sup>  
716 sequence in MHV RNA was susceptible to both EndoU-dependent and EndoU-independent  
717 cleavage. The atomic structure of EndoU revealed an RNase A-like catalytic domain (6);  
718 however, we did not anticipate the degree of overlap in substrate specificity observed for  
719 EndoU-dependent and EndoU-independent (presumably RNase A family) enzymes within BMM.  
720 Additional experiments will be required to address the identity and functional significance of the  
721 EndoU-independent (presumably RNase A family) enzymes within BMM.

722 **EndoU activity and cellular RNAs.** Substantial amounts of EndoU-dependent and RNase L-  
723 dependent cleavage of MHV RNA were detected (Fig. 5), along with RNase L-dependent  
724 cleavage of rRNA (Figs. 8A, 8B and S10), but EndoU-dependent cleavage of cellular RNAs was

725 not evident in our datasets. EndoU-dependent cleavage sites in rRNAs would be relatively easy  
726 to detect due to the abundance of rRNAs and to the well-established fold-change analyses  
727 proven to detect RNase L-dependent cleavage sites. Thus, we are confident that EndoU did not  
728 produce detectable cyclic phosphate moieties in rRNAs under the conditions of our experiments.  
729 Whether or not EndoU targets cellular mRNAs for cleavage is less certain. The low abundance  
730 of individual cellular mRNAs in our cyclic phosphate cDNA libraries precludes definitive  
731 assignment of one or another endoribonuclease to individual cleavage sites in individual cellular  
732 mRNAs. Thus, cellular mRNAs are cleaved by endoribonucleases, as they constitute ~5% of all  
733 cleavage in our cyclic phosphate cDNA libraries (Figs. 2 and S8); however, we are not able to  
734 specify which endoribonucleases are responsible for individual cleavage sites within individual  
735 cellular mRNAs due to the limited abundance of any one cellular mRNA. Because EndoU-  
736 dependent cleavage sites were abundant in MHV RNAs, we suspect that EndoU is localized  
737 within RNA replication complexes, consistent with another report (21).

738 **Does nsp16 (2' O-MT) regulate EndoU?** Deng and Baker highlight another unanswered  
739 question in the field (72): How is EndoU activity regulated to avoid unwanted cleavage  
740 events? This is an important question because MHV RNA integrity is critical for viral mRNA  
741 translation and viral RNA replication (Fig. 9). When EndoU cleaves MHV RNA, it must do so in a  
742 regulated manner to avoid self-destruction. Residual amounts of MHV genomic RNA must be  
743 maintained within infected cells to sustain an infection. One factor thought to regulate EndoU is  
744 nsp16, a 2' O-methyltransferase (1).

745 When EndoU was first characterized, Ivanov and colleagues demonstrated that EndoU-  
746 mediated cleavage of RNA substrates was prevented by 2'-O-methylation (1). They also  
747 highlighted the modular nature of viral evolution, drawing attention to the side-by-side nature of  
748 nsp15 (EndoU) and nsp16 (2' O-MT) within nidovirus genomes, suggesting a functional interplay  
749 between the two enzymes (1). 2'-O-methyltransferases have been functionally characterized in



750 two families of positive-strand RNA viruses, coronaviruses (25, 78) and flaviviruses (79-82).  
751 One function of these enzymes is to methylate the adenosine of 5' cap structures in viral  
752 mRNAs (81), to evade the antiviral activity of IFIT1 (25, 79, 80). Whether these enzymes can  
753 methylate other residues throughout viral RNA is less certain; however, 2'-O-methyltransferases  
754 are reported to inhibit the recognition of viral dsRNA by MDA5 (25). It is intriguing to note that  
755 EndoU cleavage sites (C<sup>ψ</sup>A and U<sup>ψ</sup>A sequences) contain adenosine. 2'-O-methylation of the  
756 pyrimidine at cleavage sites would prevent cleavage of viral RNA because the 2' hydroxyl of  
757 ribose is the nucleophile responsible for attacking the phosphodiester backbone (59). Whether  
758 2' O methylation of adenosine can prevent EndoU-mediated cleavage of C<sup>ψ</sup>A and U<sup>ψ</sup>A  
759 sequences remains to be determined; however, some amount of intact MHV genomic RNA  
760 must be maintained within infected cells to sustain an infection.

761 RNAseq showed that MHV RNAs were abundant (Fig. S5) and there were proportional amounts  
762 of each MHV mRNA within infected cells (Fig. 6D) despite profound changes in  
763 endoribonuclease activity from one condition to another. Thus, neither EndoU nor RNase L  
764 activities were associated with extreme changes in the proportions of one MHV mRNA to  
765 another. Rather, relatively subtle changes in MHV mRNA1-8 proportions were observed. These  
766 data suggest that EndoU and RNase L activities modulate MHV RNA abundance during  
767 infections, but do not contribute to extreme changes in the relative amounts of one MHV mRNA  
768 to another. In contrast, the absence of EndoU activity during MHV infection lead to profound  
769 increases in host gene expression associated with response to dsRNA (Figs. 8D and 8E),  
770 despite the activation of RNase L activity. Expression and translation of cellular mRNAs occurs  
771 in the context of activated RNase L despite its' ongoing degradation of cellular RNAs during a  
772 dsRNA-activated stress response (83, 84). Ongoing expression and translation of MHV mRNAs  
773 likely occur in the context of EndoU or RNase L activities in the same manner. When pre-  
774 existing host or viral mRNAs are destroyed by EndoU or RNase L activities, new MHV mRNAs

775 are synthesized to refresh the pool of viral mRNAs. Thus, MHV replication can clearly tolerate -  
776 and perhaps benefit from - both EndoU and RNase L activities.

777 **Do EndoU and RNase L co-regulate MHV RNA gene expression and replication?**

778 Importantly, EndoU and RNase L share a common cleavage site, UA (Fig. 4). Furthermore, we  
779 can distinguish between EndoU-dependent and RNase L-dependent cleavage of UA sequences  
780 because EndoU cleaves between U $\downarrow$ A dinucleotides whereas RNase L cleaves after UA $\downarrow$   
781 dinucleotides. Under some conditions, such as MHV<sup>(S)</sup>-infected and MHV<sup>(V)</sup>-infected WT BMM,  
782 UA sequences in viral RNA were cleaved predominantly by EndoU (Fig. 4G). Under other  
783 circumstances UA sequences in MHV RNA were cleaved predominantly by RNase L, as in  
784 PDE<sup>mut</sup>-infected and EndoU<sup>mut</sup>-infected WT BMM (Fig. 4G). In both cases, regardless of whether  
785 the host or viral endoribonuclease cleaves MHV RNA, the consequence will be an inhibition in  
786 viral mRNA translation and an inhibition in viral RNA replication (Fig. 9). It is interesting to see  
787 that both a host and a viral endoribonuclease have the capacity to inhibit magnitudes of MHV  
788 gene expression and replication by targeting a common set of UA sequences within the viral  
789 genome. It is also interesting that EndoU activity was subdued within IFNAR<sup>-/-</sup> and RNase L<sup>-/-</sup>  
790 cells, as if EndoU activity was modulated by RNase L activity (Fig. 5C). Together, these results  
791 suggest an interesting interplay between EndoU and dsRNA-activated host responses (Fig. 9).

792 **Summary.** We addressed a key question in the field (72): What is the natural target of  
793 coronavirus EndoU? We find that EndoU targets MHV RNA within infected cells, cleaving viral  
794 RNA on the 3' side of pyrimidines with a strong preference for cleavage between U $\downarrow$ A and C $\downarrow$ A  
795 sequences (endoY $\downarrow$ A). We postulate that EndoU cleaves MHV RNA in a regulated manner, to  
796 inhibit negative-strand RNA synthesis, reducing the accumulation of viral dsRNA, while ensuring  
797 continuing virus replication (Fig. 9). By regulating the synthesis and accumulation of viral dsRNA,  
798 coronaviruses can evade double-stranded RNA-activated antiviral responses within infected  
799 cells (22, 26, 27, 72).

800 **ACKNOWLEDGMENTS**

801 We thank members of the Barton and Weiss labs for critical evaluation of the manuscript. We  
802 thank Evan Lester for assistance with bioinformatics analyses. This work was supported by  
803 Public Health Service grants from the National Institutes of Health (F30 AI140615 to RA,  
804 AI104887 to SRW, GM119550 to JRH and AI042189 to DJB) and the Swiss National Science  
805 Foundation (SNF project 149784).

806 **AUTHOR CONTRIBUTIONS**

807 Rachel Ancar: Experimental Design, Experimental Procedures, Bioinformatics, Data Analysis,  
808 Data Curation, Interpretation of Data and Manuscript Preparation.

809 Yize Li: Experimental Design, Experimental Procedures and Interpretation of Data.

810 Eveline Kinder: Experimental Design and Experimental Procedures.

811 Daphne Cooper: Methodology and Pilot Study.

812 Monica Ransom: Experimental Procedures.

813 Volker Thiel: Experimental Design, Project Administration, Funding Acquisition and Data  
814 Interpretation.

815 Susan Weiss: Experimental Design, Project Administration, Funding Acquisition and Data  
816 Interpretation.

817 Jay Hesselberth: Experimental Design, Project Administration, Funding Acquisition and Data  
818 Interpretation and Manuscript Preparation.

819 David Barton: Experimental Design, Project Administration, Funding Acquisition, Data  
820 Interpretation and Manuscript Preparation.

821 **Competing Interests:** Authors report no competing interests.

## 822 **FIGURE LEGENDS**

823 **Figure 1. Coronavirus RNA genome and Experimental Approach.** (A) MHV RNA genome  
824 highlighting two mutations: His to Arg mutation in the MHV phosphodiesterase domain active  
825 site (PDE<sup>H126R</sup>), and a His to Ala mutation in the MHV EndoU-domain active site (EndoU<sup>H277A</sup>)  
826 (26, 38). MHV proteins are categorized as nonstructural (light grey), accessory (dark gray) and  
827 structural (black). (B) Bone marrow-derived macrophage (BMM) from WT, IFNAR<sup>-/-</sup>, and RNase  
828 L<sup>-/-</sup> mice were mock-infected or infected with WT MHV [MHV<sup>(S)</sup> and MHV<sup>(V)</sup>], the PDE<sup>mut</sup>, or  
829 EndoU<sup>mut</sup> for 9 and 12 hours (26, 29), after which total cellular RNA was isolated for cyclic  
830 phosphate sequencing. (C) Schematic of cyclic phosphate sequencing, protocol adapted from  
831 Schutz et al., 2011 (34).

832 **Figure 2. Frequency of endoribonuclease cleavage in host and viral RNAs.** (A and B)  
833 Normalized cyclic phosphate cDNA reads ([reads at each position / total reads in library])  
834 mapped to host and viral RNAs at 9 and 12 hpi in WT, IFNAR<sup>-/-</sup>, and RNase L<sup>-/-</sup> bone marrow  
835 macrophages (BMM).

836 **Figure 3. Frequency and location of endoribonuclease cleavage sites in MHV genomic**  
837 **RNA.** (A and B) Normalized cyclic phosphate cDNA reads captured at each position along the  
838 MHV genomic RNA at 9 and 12 hpi with MHV<sup>(S)</sup>, MHV<sup>(V)</sup>, PDE<sup>mut</sup>, and EndoU<sup>mut</sup> virus in (A) WT  
839 BMM, (B) IFNAR<sup>-/-</sup>, and (C) RNase L<sup>-/-</sup> BMM. Putative cleavage sites attributed to EndoU or  
840 RNase L were calculated from RNase L- or EndoU-dependent signal generated by subtracting  
841 signal from each captured position that occurs in the absence of either enzyme (RNase L<sup>-/-</sup>  
842 BMM or during EndoU<sup>mut</sup> infection). These data were then filtered for sites with reads  
843 representing at least 0.01 % of total reads in the library. At each of these positions, the log<sub>2</sub> fold  
844 change in signal when either RNase L or EndoU were absent was calculated and sites with ≥  
845 2.5 fold change were designated putative RNase L or EndoU sites.

846 **Figure 4. Dinucleotide endoribonuclease cleavage preference of MHV genomic RNA.** (A  
847 and D) Dinucleotide specificity analysis for cleavage in MHV genomic RNA by percent total  
848 cDNA reads captured at each 3'-dinucleotide in WT BMM at 9 and 12 hpi for (A) Dinucleotide  
849 analysis for positions -2: -1 and (D) Dinucleotide analysis for positions -1:+1 from captured  
850 cleavage position (0 position). (B and E). Dinucleotide enrichment for dinucleotide positions  
851 from -2: -1 (B) or -1: +1 (E) for each condition of viral infection at 12 hpi in WT BMM by  
852 comparing the frequency of dinucleotide capture in experimental conditions to the frequency of  
853 occurrence for each dinucleotide in the MHV genomic RNA sequence (control). Significant  
854 enrichment was determined by adjusted p-value (q) for fold change ( $[\log_2(\text{experiment} / \text{control})]$ ).  
855 ( $<0.02^*$ ,  $<0.0001^{**}$ ,  $<1 \times 10^{8****}$ ). Only dinucleotides with positive enrichment are shown. (C and F)  
856 Sequence logos for the 6 bases surrounding the cleavage site for position -2:-1 (C) or -1:+1 (F).  
857 Logos generated from the top 1% of either RNase L (215 sites) or EndoU-dependent cleavages  
858 (306 sites). (G) UA cleavage scoring analysis. All UA sequences in the MHV genomic RNA with  
859  $\geq 30$  cyclic phosphate counts in either the UA<sup>↓</sup> or U<sup>↓</sup>A cleavage position were compared by  
860 calculating the ratio of normalized counts (UA<sup>↓</sup> counts / U<sup>↓</sup>A counts). Ratios  $> 1$  were scored as  
861 UA<sup>↓</sup> (RNase L) sites and ratios  $< 1$  were scored as U<sup>↓</sup>A sites (EndoU) and total number of  
862 scored sites for either position are shown for each condition of viral infection in WT BMM at 9  
863 and 12 hpi. (H) Model of EndoU and RNase L interaction at UA sites in MHV RNA.

864 **Figure 5. RNase L-dependent and EndoU-dependent cleavage sites in MHV RNA.**

865 (A) Schematic outline of analysis to identify EndoU/RNase L-dependent cyclic phosphate reads.  
866 (B and C) Fold change values for the top 100 RNase L-dependent or EndoU-dependent  
867 cleavage sites. Fold change in cyclic phosphate signal when comparing WT or IFNAR<sup>(-/-)</sup> BMM  
868 infected with MHV<sup>(S)</sup>, MHV<sup>(V)</sup>, PDE<sup>mut</sup>, and EndoU<sup>mut</sup> virus to RNase L<sup>-/-</sup> BMM (B) or MHV<sup>(S)</sup>,  
869 MHV<sup>(V)</sup>, PDE<sup>mut</sup> virus to infection with EndoU<sup>mut</sup> virus across all cell types (C) displayed as violin  
870 scatter plot. Log2 fold change in the absence of RNase L activity (B) or in the absence of EndoU

871 activity (C) was calculated for each position in the MHV genomic RNA. Fold change values for  
872 the top 100 RNase L-dependent or EndoU-dependent sites were compared in WT and IFNAR<sup>-/-</sup>  
873 BMM under conditions of infection with MHV<sup>(S)</sup>, MHV<sup>(V)</sup>, PDE<sup>mut</sup>, and EndoU<sup>mut</sup> virus at 12 hpi (B)  
874 or in all cell types across conditions of infection with MHV<sup>(S)</sup>, MHV<sup>(V)</sup>, PDE<sup>mut</sup> virus at 12 hpi.

875 (D) Frequency and location of RNase L-dependent cleavage sites in MHV RNA. Cyclic  
876 phosphate counts at each position in the viral genome were normalized by removing signal that  
877 occurred in the absence of RNase L, which emphasizes sites that are RNase L-dependent in  
878 WT BMM infected with MHV<sup>(S)</sup>, and PDE<sup>mut</sup> at 9 and 12 hpi. Labeled positions and dinucleotides  
879 (-2 base : -1 base) on the graph of PDE<sup>mut</sup> represent the top 15 RNase L-dependent cleavage  
880 sites (B) with the greatest fold-change in RNase L activity (\*site with robust cleavage without  
881 canonical RNase L dinucleotide preference and independent of EndoU activity; not identified as  
882 top site by RNase L fold change analysis).

883 (E) Frequency and location of EndoU-dependent cleavage sites in MHV RNA. Cyclic phosphate  
884 counts at each position in the viral genome were normalized by removing signal that occurred in  
885 the absence of EndoU, which emphasizes sites that are EndoU-dependent and RNase L-  
886 independent in RNase L<sup>-/-</sup> BMM infected with WT MHV<sup>(V)</sup> at 9 and 12 hpi. Labeled positions and  
887 dinucleotides (-1 base : +1 base) represent the top 15 EndoU-dependent cleavage sites with the  
888 greatest fold-change in EndoU activity (C).

889 (F) Cumulative distribution of normalized counts by position of MHV genome for every position  
890 with  $\geq 10$  cyclic phosphate counts across all cell types and infection conditions.

891 **Figure 6. Abundance of cyclic phosphate ends by MHV genomic region and MHV mRNA**  
892 **abundance.** Sum of endonuclease cleavage sites in MHV RNA, by genomic regions: sum of  
893 cyclic phosphate reads (A), sum of cyclic phosphate reads normalized by MHV mRNA  
894 abundance (B) or sum of cyclic phosphate reads normalized by the length of the MHV genomic

895 region (C). (A) Sum of cyclic phosphate cDNA reads displayed by MHV RNA region for WT,  
896 IFNAR<sup>-/-</sup>, RNase L<sup>-/-</sup> BMM across all conditions of viral infection at 12 hpi. Transcriptional  
897 regulatory sequences (TRS) are numbered by their associated mRNA (2-7). Other MHV  
898 genomic regions are labeled as shown in Figure 1A. (B) Frequency of endonuclease cleavage  
899 sites in MHV RNA, by genomic regions, normalized by MHV mRNA abundance. Sum of cyclic  
900 phosphate counts normalized by mRNA abundance at each capture base, displayed by MHV  
901 genomic region for WT, IFNAR<sup>-/-</sup>, RNase L<sup>-/-</sup> BMM across all conditions of viral infection at 12  
902 hpi. (C) Percent of sum of normalized counts per length of MHV genomic region for WT, IFNAR<sup>-/-</sup>  
903 <sup>-/-</sup> and RNase L<sup>-/-</sup> BMM across all conditions of viral infection at 12 hpi. Dotted line represents  
904 baseline percent of cleavage expected by cell type ([total number of cyclic phosphate counts /  
905 total genome size x 100]). (D) Frequency and location of cleavage in the MHV TRS elements in  
906 WT BMM during infection with MHV<sup>(V)</sup> and EndoU<sup>mut</sup> at 12 hpi. The x-axis includes the  
907 sequence and position of the 6-base MHV TRS elements. (E) Normalized counts (sum of MHV  
908 sg mRNA / sum of all MHV mRNAs) of MHV sg mRNAs detected in WT, IFNAR<sup>-/-</sup>, RNase L<sup>-/-</sup>  
909 BMM across all conditions of viral infection at 9 and 12 hpi. (F) Sum of all MHV sg mRNAs  
910 (RPM) for WT, IFNAR<sup>-/-</sup>, RNase L<sup>-/-</sup> BMM across all conditions of viral infection at 9 and 12 hpi.

911 **Figure 7. MHV secondary structures associated with RNase L-dependent and EndoU-**  
912 **dependent cleavage sites.** (A and C) Nucleotide resolution graphs displaying normalized  
913 counts by position for the regions encompassing secondary structure predictions. (B and D)  
914 Secondary structures of frameshift stimulation element (B) and MHV 3'-UTR pseudoknot (D),  
915 generated using available consensus alignment and the R-scape program (85). MHV A59  
916 sequence mapped to consensus secondary structures using available covariation model and  
917 the Infernal program (86). Base coloring of MHV A59 sequence based on normalized cDNA  
918 reads as indicated in key for 12 hpi in WT BMM infected with MHV<sup>(V)</sup>. \*Base RNase L-

919 dependent cleavage activity is increased in PDE<sup>mut</sup> or EndoU<sup>mut</sup> infection as compared to MHV<sup>(V)</sup>  
920 infection.

921 **Figure 8. Endoribonuclease cleavage of cellular RNAs and changes in host gene**

922 **expression.** RNase L-dependent cleavage sites in 18S rRNA (A & B). (A) RNase L-dependent

923 cleavage sites in 18S rRNA by fold change in signal when comparing WT or IFNAR<sup>-/-</sup> BMM

924 mock-infected or infected with MHV<sup>(S)</sup>, MHV<sup>(V)</sup>, PDE<sup>mut</sup>, and EndoU<sup>mut</sup> virus to RNase L<sup>-/-</sup> BMM.

925 Log<sub>2</sub> fold change in the absence of RNase L activity was calculated for each position in the

926 rRNA. The distribution of the top 100 RNase L-dependent cleavage sites were compared in WT

927 and IFNAR<sup>-/-</sup> BMM under conditions of mock infection or infection with MHV<sup>(S)</sup>, MHV<sup>(V)</sup>, PDE<sup>mut</sup>,

928 and EndoU<sup>mut</sup> virus at 9 hpi. 18S rRNA was cleaved in an RNase L-dependent manner at UU<sup>542</sup>,

929 UU<sup>543</sup>, UU<sup>771</sup> and UA<sup>772</sup>. (B) RNase L-dependent cleavage of 18S rRNA at UU<sup>771</sup> and UA<sup>772</sup> at 9

930 and 12 hpi, predominantly in MHV PDE<sup>mut</sup>- and EndoU<sup>mut</sup>-infected WT BMM. (C) Volcano plot of

931 changes in host gene expression comparing MHV<sup>(S)</sup>-infected and mock-infected WT BMM. Host

932 genes differentially expressed (FDR < 0.05) and upregulated (logFC > 2) or downregulated

933 (logFC < -2). (D) GO analysis: MHV EndoU<sup>mut</sup> infection of WT BMM provokes increased

934 expression of host genes associated with exogenous dsRNA response. Categories of biological

935 processes with significantly upregulated genes (p < 0.01, log<sub>2</sub>FC > 2) identified by comparing

936 MHV<sup>(S)</sup>-infected and EndoU<sup>mut</sup>-infected WT BMM to mock-infected WT BMM. Top 5 categories

937 significantly enriched (weightFisher < 0.01). (E) Expression of host genes in GO category

938 “response to exogenous dsRNA”. Expression (log<sub>10</sub> normalized counts) of genes in the GO

939 category “response to exogenous dsRNA” for WT BMM at 12 hpi: mock-infected (■) or MHV-

940 infected with MHV<sup>(S)</sup> (●), MHV<sup>(V)</sup> (▲), PDE<sup>mut</sup> (+), and EndoU<sup>mut</sup> (red-circle in black square). (F

941 and G) Differential host gene expression comparing mock-infected and MHV<sup>(S)</sup>-infected cells at

942 12 hpi: WT BMM (F) and RNase L<sup>-/-</sup> BMM (G). Upregulated (fold change > 2, FDR < 0.01) and

943 downregulated transcripts (fold change < -2, FDR < 0.01).



944 **Figure 9. EndoU targets in MHV RNA.** MHV RNA was targeted for cleavage by EndoU within  
945 infected BMM. MHV RNA was cleaved by EndoU in all regions of the genome, at C<sup>↓</sup>A and U<sup>↓</sup>A  
946 sequences. Because MHV RNA is a template for both viral mRNA translation and viral RNA  
947 replication, cleavage by EndoU could inhibit both of these biosynthetic processes. Intriguingly,  
948 MHV TRS sequences contain EndoU target sequences (C<sup>↓</sup>A and U<sup>↓</sup>A sequences). TRS6,  
949 which was targeted more frequently by EndoU than other TRS elements, contains a C<sup>↓</sup>A target  
950 sequence rather than a U<sup>↓</sup>A sequence. We postulate that EndoU cleaves MHV RNA in a  
951 regulated manner, to inhibit negative-strand RNA synthesis, thereby inhibiting the accumulation  
952 of viral dsRNA. Nsp16 (2' O-MT) could regulate EndoU-mediated cleavage of MHV RNA by  
953 methylating C<sup>↓</sup>A and U<sup>↓</sup>A sequences. EndoU and RNase L cleave an overlapping set of UA  
954 sequences within MHV, suggesting a functional interplay between host and viral  
955 endoribonucleases.

## 956 SUPPLEMENTAL FIGURES AND TABLES

957 **Figure S1. Frequency and location of endoribonuclease cleavage sites in U6 snRNA and**  
958 **MHV antigenomic RNA in WT, IFNAR<sup>-/-</sup>, and RNase L<sup>-/-</sup> BMM.** Normalized 2'-3'-cp cDNA  
959 reads captured at each position along the (A) U6 snRNA and (B) MHV antigenomic RNA at 9  
960 and 12 hpi with MHV<sup>(S)</sup>, MHV<sup>(V)</sup>, PDE<sup>mut</sup>, and EndoU<sup>mut</sup> virus in IFNAR<sup>-/-</sup> BMM.

961 **Figure S2. Dinucleotide cleavage pattern in MHV genomic RNA downstream of captured**  
962 **3' RNA end.** Percent total 2'-3'-cp cDNA reads captured at each dinucleotide in WT BMM at 9  
963 and 12 hpi for bases +1:+2 and +2:+3 from the captured cleavage position (0-base).

964 **Figure S3. Endoribonuclease cleavage preferences in MHV RNA from IFNAR<sup>-/-</sup> and RNase**  
965 **L<sup>-/-</sup> BMM.** (A) and (B) Dinucleotide specificity analysis for cleavage in MHV genomic RNA by  
966 percent total cyclic phosphate cDNA reads captured at each 3'-dinucleotide at 9 and 12 hpi in  
967 (A) IFNAR<sup>-/-</sup> BMM for positions -2:-1 and in (B) RNase L<sup>-/-</sup> BMM for positions -1:+1.

968 **Figure S4. Interaction between RNase L and EndoU cleavage at UA sequences in MHV**  
969 **RNA.** (A) UA cleavage scoring analysis. All UA sequences in the MHV genomic RNA with  $\geq 30$   
970 cyclic phosphate counts in either the UA $\downarrow$  or U $\downarrow$ A cleavage position were compared by  
971 calculating the ratio of normalized counts (UA $\downarrow$  counts / U $\downarrow$ A counts). Ratios  $> 1$  were scored as  
972 UA $\downarrow$  (RNase L) sites and ratios  $< 1$  were scored as U $\downarrow$ A sites (EndoU) and total number of  
973 scored sites for either position are shown for each condition of viral infection in IFNAR<sup>-/-</sup> and  
974 RNase L<sup>-/-</sup> BMM. (B) Frequency and location of UA positions in WT BMM under all conditions of  
975 viral infection which had  $\geq 50$  counts at U $\downarrow$ A positions and  $\leq 1$  counts at UA $\downarrow$  positions. The top  
976 5 of these positions by normalized count are labeled. (C) Frequency and location of UA  
977 positions in IFNAR<sup>-/-</sup> and RNase L<sup>-/-</sup> BMM under all conditions of viral infection which had  $\geq 50$   
978 counts at U $\downarrow$ A positions and  $\leq 1$  counts at UA $\downarrow$  positions.

979 **Figure S5. MHV RNA abundance and RNAseq reads across the MHV genome.** (A) Total  
980 RNAseq normalized counts assigned to MHV genomic features for each library. (B) Coverage of  
981 RNAseq read density across the MHV genome in reads per million.

982 **Figure S6. Frequency and location of endoribonuclease cleavage in MHV 3'-UTR.**  
983 Nucleotide and sequence resolution graphs displaying normalized counts in (A) WT, (B) IFNAR<sup>-</sup>  
984 <sup>-</sup> (C) RNase L<sup>-</sup> BMM during infection with MHV<sup>(V)</sup> and EndoU<sup>mut</sup> MHV. Nucleotide resolution  
985 graphs of region directly upstream of poly-A tail with cyclic phosphate counts normalized by  
986 RNA abundance in (D) WT, (E) IFNAR<sup>-</sup> (F) RNase L<sup>-</sup> BMM.

987 **Figure S7. Regional cleavage of MHV RNA and total subgenomic mRNA abundance.** (A)  
988 Sum of cyclic phosphate counts normalized by mRNA abundance displayed by region for WT,  
989 IFNAR<sup>-</sup>, RNase L<sup>-</sup> BMM across all conditions of viral infection at 12 hpi. (B) Percent of sum of  
990 normalized counts per length of genomic region for WT, IFNAR<sup>-</sup>, RNase L<sup>-</sup> BMM across all  
991 conditions of viral infection at 12 hpi. Dotted line represents baseline percent of cleavage  
992 expected by cell type ( $[\text{total number of cyclic phosphate counts} / \text{total genome size} \times 100]$ ). (C)  
993 Sum of all subgenomic mRNAs (RPM) for WT, IFNAR<sup>-</sup>, RNase L<sup>-</sup> BMM across all conditions of  
994 viral infection at 9 and 12 hpi.

995 **Figure S8. Cyclic phosphate sequencing analysis of experiment 2.** (A) Normalized cyclic  
996 phosphate cDNA reads ( $[\text{reads at each position} / \text{total reads in library}]$ ) aligning to host and viral  
997 RNAs at 9 and 12 hpi in WT and RNase L<sup>-</sup> bone marrow macrophages (BMM). (B) Putative  
998 cleavage sites attributed to EndoU or RNase L were calculated from RNase L- or EndoU-  
999 dependent signal generated by subtracting signal from each captured position that occurs in the  
1000 absence of either enzyme (RNase L<sup>-</sup> BMM or during EndoU<sup>mut</sup> infection). These data were then  
1001 filtered for sites with reads representing at least 0.01 % of total reads in the library. At each of  
1002 these positions, the log<sub>2</sub> fold change in signal when either RNase L or EndoU were absent was  
1003 calculated and sites with  $\geq 2.5$  fold change were called as putative RNase L or EndoU sites. (C)

1004 and D) Dinucleotide specificity analysis for cleavage in MHV genomic RNA by percent total  
1005 cDNA reads captured at each 3'-dinucleotide in WT BMM at 9 and 12 hpi for (C) Dinucleotide  
1006 analysis for positions -2: -1 and (D) Dinucleotide analysis for positions -1:+1 from captured  
1007 cleavage position (0 position). (E) Cumulative distribution of normalized counts by position of  
1008 the MHV genome for every position with  $\geq 10$  cyclic phosphates counts across all cell types  
1009 and infection conditions. (F) UA cleavage scoring analysis. All UA sequences in the MHV  
1010 genomic RNA with  $\geq 30$  cyclic phosphate counts in either the UA<sup>ψ</sup> or U<sup>ψ</sup>A cleavage position  
1011 were compared by calculating the ratio of normalized counts (UA<sup>ψ</sup> counts / U<sup>ψ</sup>A counts). Ratios  
1012  $> 1$  were scored as UA<sup>ψ</sup> (RNase L) sites and ratios  $< 1$  were scored as U<sup>ψ</sup>A sites (EndoU) and  
1013 total number of scored sites for either position are shown for each condition of viral infection in  
1014 WT BMM at 9 and 12 hpi. (H) Model of EndoU and RNase L interaction at UA sites in MHV RNA.  
1015 (G) Nucleotide and sequence resolution graphs displaying normalized counts in WT BMM  
1016 during infection with MHV<sup>(S)</sup> and EndoU<sup>mut</sup> MHV of region directly upstream of poly(A) tail.

1017 **Figure S9. Cyclic phosphate and RNAseq analysis of MHV RNA from experiment 2.** (A)  
1018 Sum of normalized counts displayed by region for WT and RNase L<sup>-/-</sup> BMM across all conditions  
1019 of viral infection at 12 hpi. Transcription regulatory sequences (TRS) are numbered by their  
1020 associated mRNA (2-7). Other genomic regions are labeled as shown in Figure 1A. (B) Sum of  
1021 cyclic phosphate counts normalized by mRNA abundance and length of each genomic region  
1022  $[(\text{sum per region (cyclic phosphate counts / RNAseq counts)} / \text{length of region (bp)} * 100) \text{ sum}$   
1023  $\text{of cyclic phosphate abundance normalized counts per region}) / \text{length of region} * 100]$  displayed  
1024 by region for WT and RNase L<sup>-/-</sup> BMM across all conditions of viral infection at 12 hpi. (C)  
1025 Normalized counts (sum of subgenomic mRNA / sum of all mRNAs) of subgenomic mRNAs  
1026 detected in WT and RNase L<sup>-/-</sup> BMM across all conditions of viral infection at 9 and 12 hpi. (D)  
1027 Sum of all subgenomic mRNAs (RPM) for WT and RNase L<sup>-/-</sup> BMM across all conditions of viral  
1028 infection at 9 and 12 hpi.

1029 **Figure S10. RNase L targeting of rRNA and mRNA during WT and mutant MHV infection.**

1030 (A) Top 3 RNase L-dependent cleavage sites in 18S rRNA by fold change ( $\log_2$ WT BMM /  
1031 RNase L<sup>-/-</sup> BMM) for all conditions of infection at 9 and 12 hpi in WT BMM. (B) Table of total  
1032 RNase L- or EndoU-dependent cleavage sites in 18S, 28S, 5.8S, and 5S rRNA. RNase L- or  
1033 EndoU-dependent cleavage were determined by identifying the top 1% of enzyme-dependent  
1034 signal with a > 4 fold change in signal in the absence of RNase L or EndoU that match the  
1035 RNase L ("UA", "UU", "UG", "UC") or EndoU ("UA", "CA") sequence preferences. (C)  
1036 Distribution of sites in rRNA by fold change in signal when comparing WT or IFNAR<sup>-/-</sup> BMM  
1037 mock-infected or virus-infected with MHV<sup>(S)</sup>, MHV<sup>(V)</sup>, PDE<sup>mut</sup>, and EndoU<sup>mut</sup> virus to RNase L<sup>-/-</sup>  
1038 BMM. Log<sub>2</sub> fold change in the absence of RNase L activity was calculated for each position in  
1039 the rRNA. The distribution of the top 100 RNase L-dependent sites were compared in WT and  
1040 IFNAR<sup>-/-</sup> BMM under conditions of mock infection or virus infection with MHV<sup>(S)</sup>, MHV<sup>(V)</sup>, PDE<sup>mut</sup>,  
1041 and EndoU<sup>mut</sup> virus at 12 hpi. (D) Distribution of sites in 18S, 28S, 5S, and 5.8S rRNA with the  
1042 greatest fold change in signal when comparing mock infection or virus infection with MHV<sup>(S)</sup>,  
1043 MHV<sup>(V)</sup>, PDE<sup>mut</sup> virus to infection with EndoU<sup>mut</sup> virus. Log<sub>2</sub> fold change in the absence of EndoU  
1044 activity was calculated for each position in the rRNA. The distribution of the top 100 EndoU-  
1045 dependent sites were compared in all cell types across conditions of mock infection or infection  
1046 with MHV<sup>(S)</sup>, MHV<sup>(V)</sup>, PDE<sup>mut</sup>, and EndoU<sup>mut</sup> virus at 9 and 12 hpi.

1047 **Figure S11. Correlation between cyclic phosphate counts and RNA abundance.** (A and B).

1048 Correlation between mRNA abundance and 2'-3'-cp counts at each base captured in the MHV  
1049 genome (all comparisons significant ( $p < 10^{-50}$ ) for experiment 1 (A) and experiment 2 (B)). (C  
1050 and D) Distribution of sites in MHV by normalized cyclic phosphates counts for sense and  
1051 antisense RNAs from experiment 1 (C) and experiment 2 (D) across all conditions of infection  
1052 and cell types. Positions are only shown if there was > 1 read in either the sense and antisense  
1053 RNA.

1054 **Figure S12. Effect of WT and mutant MHV infection on other cellular endoribonucleases.**

1055 (A and B) Volcano plot of differentially expressed (FDR < 0.05) and upregulated (logFC > 2)/  
1056 downregulated (logFC < -2) genes when comparing EndoU<sup>mut</sup> infection to mock infection in WT  
1057 BMM (A) or MHV<sup>(s)</sup> infection to EndoU<sup>mut</sup> infection in WT BMM. (C) Expression (log10  
1058 normalized RNAseq counts) of RNase A, angiogenin, and RNaseT2 genes with at least 5 >  
1059 normalized counts in all conditions.

1060 **Table S1 and S2. Dinucleotide enrichment and de-enrichment analysis at 9 and 12 hpi in**

1061 **WT BMM.** Complete tables of dinucleotide enrichment and de-enrichment for -2 base: +2 base  
1062 (table 1) or -1 base:-1 base (table 2) from the captured RNA end (0-base position) for each  
1063 condition of viral infection at 9 and 12 hpi in WT BMM by comparing the frequency of  
1064 dinucleotide capture in experimental conditions to the frequency of occurrence for each  
1065 dinucleotide in the MHV genomic RNA sequence (control). Significant enrichment was  
1066 determined by adjusted p-value (q) for fold change (log<sub>2</sub>(experiment / control)). (<0.02\*,  
1067 <0.0001\*\*, <1×10<sup>8</sup>\*\*\*).

1068 **Table S3: SNP variants in MHV genome related to endoribonuclease cleavage.** Table of all

1069 single nucleotide variants (SNPs) identify from alignments of RNAseq libraries to the MHV  
1070 genome. The SNPs in **green** are sites where the mutation generated a “CA” dinucleotide that  
1071 was cleaved by EndoU. The SNPs in **red** and **yellow** are the inactivating mutations in the  
1072 EndoU and PDE domains of MHV respectively.

1073 **REFERENCES**

- 1074 1. **Ivanov KA, Hertzog T, Rozanov M, Bayer S, Thiel V, Gorbalenya AE, Ziebuhr**  
1075 **J.** 2004. Major genetic marker of nidoviruses encodes a replicative  
1076 endoribonuclease. *Proc Natl Acad Sci U S A* **101**:12694-12699.
- 1077 2. **Gorbalenya AE, Enjuanes L, Ziebuhr J, Snijder EJ.** 2006. Nidovirales:  
1078 evolving the largest RNA virus genome. *Virus Res* **117**:17-37.
- 1079 3. **Wu A, Peng Y, Huang B, Ding X, Wang X, Niu P, Meng J, Zhu Z, Zhang Z,**  
1080 **Wang J, Sheng J, Quan L, Xia Z, Tan W, Cheng G, Jiang T.** 2020. Genome  
1081 Composition and Divergence of the Novel Coronavirus (2019-nCoV) Originating  
1082 in China. *Cell Host Microbe* **27**:325-328.
- 1083 4. **Zhang M, Li X, Deng Z, Chen Z, Liu Y, Gao Y, Wu W, Chen Z.** 2017. Structural  
1084 Biology of the Arterivirus nsp11 Endoribonucleases. *J Virol* **91**.
- 1085 5. **Zhang L, Li L, Yan L, Ming Z, Jia Z, Lou Z, Rao Z.** 2018. Structural and  
1086 Biochemical Characterization of Endoribonuclease Nsp15 Encoded by Middle  
1087 East Respiratory Syndrome Coronavirus. *J Virol* **92**.
- 1088 6. **Ricagno S, Egloff MP, Ulferts R, Coutard B, Nurizzo D, Campanacci V,**  
1089 **Cambillau C, Ziebuhr J, Canard B.** 2006. Crystal structure and mechanistic  
1090 determinants of SARS coronavirus nonstructural protein 15 define an  
1091 endoribonuclease family. *Proc Natl Acad Sci U S A* **103**:11892-11897.

- 1092 7. **Bhardwaj K, Palaninathan S, Alcantara JM, Yi LL, Guarino L, Sacchettini JC,**  
1093 **Kao CC.** 2008. Structural and functional analyses of the severe acute respiratory  
1094 syndrome coronavirus endoribonuclease Nsp15. *J Biol Chem* **283**:3655-3664.
- 1095 8. **Nedialkova DD, Ulferts R, van den Born E, Lauber C, Gorbalenya AE,**  
1096 **Ziebuhr J, Snijder EJ.** 2009. Biochemical characterization of arterivirus  
1097 nonstructural protein 11 reveals the nidovirus-wide conservation of a replicative  
1098 endoribonuclease. *J Virol* **83**:5671-5682.
- 1099 9. **Bredenbeek PJ, Pachuk CJ, Noten AF, Charite J, Luytjes W, Weiss SR,**  
1100 **Spaan WJ.** 1990. The primary structure and expression of the second open  
1101 reading frame of the polymerase gene of the coronavirus MHV-A59; a highly  
1102 conserved polymerase is expressed by an efficient ribosomal frameshifting  
1103 mechanism. *Nucleic Acids Res* **18**:1825-1832.
- 1104 10. **Sawicki SG, Sawicki DL, Siddell SG.** 2007. A contemporary view of  
1105 coronavirus transcription. *J Virol* **81**:20-29.
- 1106 11. **Knoops K, Kikkert M, Worm SH, Zevenhoven-Dobbe JC, van der Meer Y,**  
1107 **Koster AJ, Mommaas AM, Snijder EJ.** 2008. SARS-coronavirus replication is  
1108 supported by a reticulovesicular network of modified endoplasmic reticulum.  
1109 *PLoS Biol* **6**:e226.
- 1110 12. **van der Hoeven B, Oudshoorn D, Koster AJ, Snijder EJ, Kikkert M, Barcena**  
1111 **M.** 2016. Biogenesis and architecture of arterivirus replication organelles. *Virus*  
1112 *Res* **220**:70-90.



- 1113 13. **van Hemert MJ, van den Worm SH, Knoops K, Mommaas AM, Gorbalenya**  
1114 **AE, Snijder EJ.** 2008. SARS-coronavirus replication/transcription complexes are  
1115 membrane-protected and need a host factor for activity in vitro. PLoS Pathog  
1116 **4:e1000054.**
- 1117 14. **Sawicki SG, Sawicki DL.** 1990. Coronavirus transcription: subgenomic mouse  
1118 hepatitis virus replicative intermediates function in RNA synthesis. J Virol  
1119 **64:1050-1056.**
- 1120 15. **Sethna PB, Hung SL, Brian DA.** 1989. Coronavirus subgenomic minus-strand  
1121 RNAs and the potential for mRNA replicons. Proc Natl Acad Sci U S A **86:5626-**  
1122 **5630.**
- 1123 16. **Sola I, Almazan F, Zuniga S, Enjuanes L.** 2015. Continuous and Discontinuous  
1124 RNA Synthesis in Coronaviruses. Annu Rev Virol **2:265-288.**
- 1125 17. **Kazi L, Lissenberg A, Watson R, de Groot RJ, Weiss SR.** 2005. Expression of  
1126 hemagglutinin esterase protein from recombinant mouse hepatitis virus  
1127 enhances neurovirulence. J Virol **79:15064-15073.**
- 1128 18. **Lissenberg A, Vrolijk MM, van Vliet AL, Langereis MA, de Groot-Mijnes JD,**  
1129 **Rottier PJ, de Groot RJ.** 2005. Luxury at a cost? Recombinant mouse hepatitis  
1130 viruses expressing the accessory hemagglutinin esterase protein display reduced  
1131 fitness in vitro. J Virol **79:15054-15063.**
- 1132 19. **Luytjes W, Bredenbeek PJ, Noten AF, Horzinek MC, Spaan WJ.** 1988.  
1133 Sequence of mouse hepatitis virus A59 mRNA 2: indications for RNA

- 1134 recombination between coronaviruses and influenza C virus. *Virology* **166**:415-  
1135 422.
- 1136 20. **Shieh CK, Lee HJ, Yokomori K, La Monica N, Makino S, Lai MM.** 1989.  
1137 Identification of a new transcriptional initiation site and the corresponding  
1138 functional gene 2b in the murine coronavirus RNA genome. *J Virol* **63**:3729-3736.
- 1139 21. **V'Kovski P, Gerber M, Kelly J, Pfaender S, Ebert N, Braga Lagache S,**  
1140 **Simillion C, Portmann J, Stalder H, Gaschen V, Bruggmann R, Stoffel MH,**  
1141 **Heller M, Dijkman R, Thiel V.** 2019. Determination of host proteins composing  
1142 the microenvironment of coronavirus replicase complexes by proximity-labeling.  
1143 *Elife* **8**.
- 1144 22. **Deng X, Hackbart M, Mettelman RC, O'Brien A, Mielech AM, Yi G, Kao CC,**  
1145 **Baker SC.** 2017. Coronavirus nonstructural protein 15 mediates evasion of  
1146 dsRNA sensors and limits apoptosis in macrophages. *Proc Natl Acad Sci U S A*  
1147 **114**:E4251-E4260.
- 1148 23. **Kang H, Bhardwaj K, Li Y, Palaninathan S, Sacchettini J, Guarino L,**  
1149 **Leibowitz JL, Kao CC.** 2007. Biochemical and genetic analyses of murine  
1150 hepatitis virus Nsp15 endoribonuclease. *J Virol* **81**:13587-13597.
- 1151 24. **Ulferts R, Ziebuhr J.** 2011. Nidovirus ribonucleases: Structures and functions in  
1152 viral replication. *RNA Biol* **8**:295-304.
- 1153 25. **Zust R, Cervantes-Barragan L, Habjan M, Maier R, Neuman BW, Ziebuhr J,**  
1154 **Szretter KJ, Baker SC, Barchet W, Diamond MS, Siddell SG, Ludewig B,**

- 1155           **Thiel V.** 2011. Ribose 2'-O-methylation provides a molecular signature for the  
1156           distinction of self and non-self mRNA dependent on the RNA sensor Mda5. *Nat*  
1157           *Immunol* **12**:137-143.
- 1158   26.   **Kindler E, Gil-Cruz C, Spanier J, Li Y, Wilhelm J, Rabouw HH, Zust R,**  
1159           **Hwang M, V'Kovski P, Stalder H, Marti S, Habjan M, Cervantes-Barragan L,**  
1160           **Elliot R, Karl N, Gaughan C, van Kuppeveld FJ, Silverman RH, Keller M,**  
1161           **Ludewig B, Bergmann CC, Ziebuhr J, Weiss SR, Kalinke U, Thiel V.** 2017.  
1162           Early endonuclease-mediated evasion of RNA sensing ensures efficient  
1163           coronavirus replication. *PLoS Pathog* **13**:e1006195.
- 1164   27.   **Deng X, van Geelen A, Buckley AC, O'Brien A, Pillatzki A, Lager KM,**  
1165           **Faaberg KS, Baker SC.** 2019. Coronavirus Endoribonuclease Activity in Porcine  
1166           Epidemic Diarrhea Virus Suppresses Type I and Type III Interferon Responses. *J*  
1167           *Virology* **93**.
- 1168   28.   **Zhao L, Birdwell LD, Wu A, Elliott R, Rose KM, Phillips JM, Li Y, Grinspan J,**  
1169           **Silverman RH, Weiss SR.** 2013. Cell-type-specific activation of the  
1170           oligoadenylate synthetase-RNase L pathway by a murine coronavirus. *J Virology*  
1171           **87**:8408-8418.
- 1172   29.   **Zhao L, Jha BK, Wu A, Elliott R, Ziebuhr J, Gorbalenya AE, Silverman RH,**  
1173           **Weiss SR.** 2012. Antagonism of the interferon-induced OAS-RNase L pathway  
1174           by murine coronavirus ns2 protein is required for virus replication and liver  
1175           pathology. *Cell Host Microbe* **11**:607-616.

- 1176 30. **Zhao L, Rose KM, Elliott R, Van Rooijen N, Weiss SR.** 2011. Cell-type-specific  
1177 type I interferon antagonism influences organ tropism of murine coronavirus. *J*  
1178 *Virology* **85**:10058-10068.
- 1179 31. **Cooper DA, Banerjee S, Chakrabarti A, Garcia-Sastre A, Hesselberth JR,**  
1180 **Silverman RH, Barton DJ.** 2015. RNase L targets distinct sites in influenza A  
1181 virus RNAs. *J Virol* **89**:2764-2776.
- 1182 32. **Cooper DA, Jha BK, Silverman RH, Hesselberth JR, Barton DJ.** 2014.  
1183 Ribonuclease L and metal-ion-independent endoribonuclease cleavage sites in  
1184 host and viral RNAs. *Nucleic Acids Res* **42**:5202-5216.
- 1185 33. **Donovan J, Rath S, Kolet-Mandrikov D, Korennykh A.** 2017. Rapid RNase L-  
1186 driven arrest of protein synthesis in the dsRNA response without degradation of  
1187 translation machinery. *RNA* **23**:1660-1671.
- 1188 34. **Schutz K, Hesselberth JR, Fields S.** 2010. Capture and sequence analysis of  
1189 RNAs with terminal 2',3'-cyclic phosphates. *RNA* **16**:621-631.
- 1190 35. **Coley SE, Lavi E, Sawicki SG, Fu L, Schelle B, Karl N, Siddell SG, Thiel V.**  
1191 2005. Recombinant mouse hepatitis virus strain A59 from cloned, full-length  
1192 cDNA replicates to high titers in vitro and is fully pathogenic in vivo. *J Virol*  
1193 **79**:3097-3106.
- 1194 36. **Eriksson KK, Makia D, Thiel V.** 2008. Generation of recombinant coronaviruses  
1195 using vaccinia virus as the cloning vector and stable cell lines containing  
1196 coronaviral replicon RNAs. *Methods Mol Biol* **454**:237-254.

- 1197 37. **Thiel V, Herold J, Schelle B, Siddell SG.** 2001. Infectious RNA transcribed in  
1198 vitro from a cDNA copy of the human coronavirus genome cloned in vaccinia  
1199 virus. *J Gen Virol* **82**:1273-1281.
- 1200 38. **Roth-Cross JK, Stokes H, Chang G, Chua MM, Thiel V, Weiss SR,**  
1201 **Gorbalenya AE, Siddell SG.** 2009. Organ-specific attenuation of murine  
1202 hepatitis virus strain A59 by replacement of catalytic residues in the putative viral  
1203 cyclic phosphodiesterase ns2. *J Virol* **83**:3743-3753.
- 1204 39. **Smith T, Heger A, Sudbery I.** 2017. UMI-tools: modeling sequencing errors in  
1205 Unique Molecular Identifiers to improve quantification accuracy. *Genome Res*  
1206 **27**:491-499.
- 1207 40. **Langmead B, Salzberg SL.** 2012. Fast gapped-read alignment with Bowtie 2.  
1208 *Nat Methods* **9**:357-359.
- 1209 41. **Quinlan AR, Hall IM.** 2010. BEDTools: a flexible suite of utilities for comparing  
1210 genomic features. *Bioinformatics* **26**:841-842.
- 1211 42. **Martin M.** 2011. Cutadapt removes adapter sequences from high-throughput  
1212 sequencing reads. *EMBnetjournal* **17**:1-3.
- 1213 43. **Dobin A, Gingeras TR.** 2002. Mapping RNA-seq reads with STAR.29, 11.14.1-  
1214 11.14.19. John Wiley & Sons, Inc.

- 1215 44. **Liao Y, Smyth GK, Shi W.** 2014. featureCounts: an efficient general purpose  
1216 program for assigning sequence reads to genomic features. *Bioinformatics*  
1217 **30**:923-930.
- 1218 45. **Love MI, Huber W, Anders S.** 2014. Moderated estimation of fold change and  
1219 dispersion for RNA-seq data with DESeq2. *Genome Biol* **15**:550.
- 1220 46. **Patro R, Duggal G, Love MI, Irizarry RA, Kingsford C.** 2017. Salmon provides  
1221 fast and bias-aware quantification of transcript expression. *Nat Methods* **14**:417-  
1222 419.
- 1223 47. **Soneson C, Love MI, Robinson MD.** 2015. Differential analyses for RNA-seq:  
1224 transcript-level estimates improve gene-level inferences. *F1000Res* **4**:1521.
- 1225 48. **Gu Z, Eils R, Schlesner M.** 2016. Complex heatmaps reveal patterns and  
1226 correlations in multidimensional genomic data. *Bioinformatics* **32**:2847-2849.
- 1227 49. **Blighe K, Rana S, Lewis M.** 2019. EnhancedVolcano: Publication-ready volcano  
1228 plots with enhanced colouring and labeling., R package version.
- 1229 50. **Alexa A, Rahnenfuhrer J.** 2019. topGO: Enrichment analysis for gene ontology.,  
1230 R package version 2.37.0.
- 1231 51. **Bailey TL, Boden M, Buske FA, Frith M, Grant CE, Clementi L, Ren J, Li WW,**  
1232 **Noble WS.** 2009. MEME SUITE: tools for motif discovery and searching. *Nucleic*  
1233 *Acids Res* **37**:W202-208.

- 1234 52. **Wagih O.** 2017. ggseqlogo: a versatile R package for drawing sequence logos.  
1235 Bioinformatics **33**:3645-3647.
- 1236 53. **Irigoyen N, Firth AE, Jones JD, Chung BY, Siddell SG, Brierley I.** 2016. High-  
1237 Resolution Analysis of Coronavirus Gene Expression by RNA Sequencing and  
1238 Ribosome Profiling. PLoS Pathog **12**:e1005473.
- 1239 54. **Riemyndy KA, Sheridan RM, Gillen A, Yu Y, Bennett CG, Hesselberth JR.**  
1240 2017. valr: Reproducible genome interval analysis in R. F1000Res **6**:1025.
- 1241 55. **Li H.** 2011. A statistical framework for SNP calling, mutation discovery,  
1242 association mapping and population genetical parameter estimation from  
1243 sequencing data. Bioinformatics **27**:2987-2993.
- 1244 56. **Kivioja T, Vaharautio A, Karlsson K, Bonke M, Enge M, Linnarsson S,**  
1245 **Taipale J.** 2011. Counting absolute numbers of molecules using unique  
1246 molecular identifiers. Nat Methods **9**:72-74.
- 1247 57. **Mroczek S, Krwawicz J, Kutner J, Lazniewski M, Kucinski I, Ginalski K,**  
1248 **Dziembowski A.** 2012. C16orf57, a gene mutated in poikiloderma with  
1249 neutropenia, encodes a putative phosphodiesterase responsible for the U6  
1250 snRNA 3' end modification. Genes Dev **26**:1911-1925.
- 1251 58. **Shchepachev V, Wischnewski H, Missiaglia E, Soneson C, Azzalin CM.** 2012.  
1252 Mpn1, mutated in poikiloderma with neutropenia protein 1, is a conserved 3'-to-5'  
1253 RNA exonuclease processing U6 small nuclear RNA. Cell Rep **2**:855-865.

- 1254 59. **Yang W.** 2011. Nucleases: diversity of structure, function and mechanism. *Q Rev*  
1255 *Biophys* **44**:1-93.
- 1256 60. **Bhardwaj K, Sun J, Holzenburg A, Guarino LA, Kao CC.** 2006. RNA  
1257 recognition and cleavage by the SARS coronavirus endoribonuclease. *J Mol Biol*  
1258 **361**:243-256.
- 1259 61. **Harper JW, Fox EA, Shapiro R, Vallee BL.** 1990. Mutagenesis of residues  
1260 flanking Lys-40 enhances the enzymatic activity and reduces the angiogenic  
1261 potency of angiogenin. *Biochemistry* **29**:7297-7302.
- 1262 62. **Hofsteenge J, Moldow C, Vicentini AM, Zelenko O, Jarai-Kote Z, Neumann U.**  
1263 1998. A single amino acid substitution changes ribonuclease 4 from a uridine-  
1264 specific to a cytidine-specific enzyme. *Biochemistry* **37**:9250-9257.
- 1265 63. **Schwartz L, Cohen A, Thomas J, Spencer JD.** 2018. The Immunomodulatory  
1266 and Antimicrobial Properties of the Vertebrate Ribonuclease A Superfamily.  
1267 *Vaccines (Basel)* **6**.
- 1268 64. **Shapiro R, Vallee BL.** 1991. Interaction of human placental ribonuclease with  
1269 placental ribonuclease inhibitor. *Biochemistry* **30**:2246-2255.
- 1270 65. **Birdwell LD, Zalinger ZB, Li Y, Wright PW, Elliott R, Rose KM, Silverman RH,**  
1271 **Weiss SR.** 2016. Activation of RNase L by Murine Coronavirus in Myeloid Cells  
1272 Is Dependent on Basal Oas Gene Expression and Independent of Virus-Induced  
1273 Interferon. *J Virol* **90**:3160-3172.



- 1274 66. **Goebel SJ, Miller TB, Bennett CJ, Bernard KA, Masters PS.** 2007. A  
1275 hypervariable region within the 3' cis-acting element of the murine coronavirus  
1276 genome is nonessential for RNA synthesis but affects pathogenesis. *J Virol*  
1277 **81**:1274-1287.
- 1278 67. **Peng YH, Lin CH, Lin CN, Lo CY, Tsai TL, Wu HY.** 2016. Characterization of  
1279 the Role of Hexamer AGUAAA and Poly(A) Tail in Coronavirus Polyadenylation.  
1280 *PLoS One* **11**:e0165077.
- 1281 68. **Zust R, Miller TB, Goebel SJ, Thiel V, Masters PS.** 2008. Genetic interactions  
1282 between an essential 3' cis-acting RNA pseudoknot, replicase gene products,  
1283 and the extreme 3' end of the mouse coronavirus genome. *J Virol* **82**:1214-1228.
- 1284 69. **Volk A, Hackbart M, Deng X, Cruz-Pulido Y, O'Brien A, Baker SC.** 2020.  
1285 Coronavirus Endoribonuclease and Deubiquitinating Interferon Antagonists  
1286 Differentially Modulate the Host Response during Replication in Macrophages. *J*  
1287 *Virol* doi:10.1128/JVI.00178-20.
- 1288 70. **Greulich W, Wagner M, Gaidt MM, Stafford C, Cheng Y, Linder A, Carell T,**  
1289 **Hornung V.** 2019. TLR8 Is a Sensor of RNase T2 Degradation Products. *Cell*  
1290 **179**:1264-1275 e1213.
- 1291 71. **Dyer KD, Rosenberg HF.** 2005. The mouse RNase 4 and RNase 5/ang 1 locus  
1292 utilizes dual promoters for tissue-specific expression. *Nucleic Acids Res*  
1293 **33**:1077-1086.

- 1294 72. **Deng X, Baker SC.** 2018. An "Old" protein with a new story: Coronavirus  
1295 endoribonuclease is important for evading host antiviral defenses. *Virology*  
1296 **517**:157-163.
- 1297 73. **Hackbart M, Deng X, Baker SC.** 2020. Coronavirus endoribonuclease targets  
1298 viral polyuridine sequences to evade activating host sensors. *Proc Natl Acad Sci*  
1299 *U S A* **117**:8094-8103.
- 1300 74. **Sawicki SG, Sawicki DL.** 1986. Coronavirus minus-strand RNA synthesis and  
1301 effect of cycloheximide on coronavirus RNA synthesis. *J Virol* **57**:328-334.
- 1302 75. **Kirchdoerfer RN, Ward AB.** 2019. Structure of the SARS-CoV nsp12  
1303 polymerase bound to nsp7 and nsp8 co-factors. *Nat Commun* **10**:2342.
- 1304 76. **te Velthuis AJ, Arnold JJ, Cameron CE, van den Worm SH, Snijder EJ.** 2010.  
1305 The RNA polymerase activity of SARS-coronavirus nsp12 is primer dependent.  
1306 *Nucleic Acids Res* **38**:203-214.
- 1307 77. **Imbert I, Guillemot JC, Bourhis JM, Bussetta C, Coutard B, Egloff MP,**  
1308 **Ferron F, Gorbalenya AE, Canard B.** 2006. A second, non-canonical RNA-  
1309 dependent RNA polymerase in SARS coronavirus. *EMBO J* **25**:4933-4942.
- 1310 78. **Menachery VD, Yount BL, Jr., Josset L, Gralinski LE, Scobey T,**  
1311 **Agnihothram S, Katze MG, Baric RS.** 2014. Attenuation and restoration of  
1312 severe acute respiratory syndrome coronavirus mutant lacking 2'-o-  
1313 methyltransferase activity. *J Virol* **88**:4251-4264.

- 1314 79. **Daffis S, Szretter KJ, Schriewer J, Li J, Youn S, Errett J, Lin TY, Schneller S,**  
1315 **Zust R, Dong H, Thiel V, Sen GC, Fensterl V, Klimstra WB, Pierson TC,**  
1316 **Buller RM, Gale M, Jr., Shi PY, Diamond MS.** 2010. 2'-O methylation of the  
1317 viral mRNA cap evades host restriction by IFIT family members. *Nature* **468**:452-  
1318 456.
- 1319 80. **Dong H, Chang DC, Hua MH, Lim SP, Chionh YH, Hia F, Lee YH, Kukkaro P,**  
1320 **Lok SM, Dedon PC, Shi PY.** 2012. 2'-O methylation of internal adenosine by  
1321 flavivirus NS5 methyltransferase. *PLoS Pathog* **8**:e1002642.
- 1322 81. **Ray D, Shah A, Tilgner M, Guo Y, Zhao Y, Dong H, Deas TS, Zhou Y, Li H,**  
1323 **Shi PY.** 2006. West Nile virus 5'-cap structure is formed by sequential guanine  
1324 N-7 and ribose 2'-O methylations by nonstructural protein 5. *J Virol* **80**:8362-8370.
- 1325 82. **Szretter KJ, Daniels BP, Cho H, Gainey MD, Yokoyama WM, Gale M, Jr.,**  
1326 **Virgin HW, Klein RS, Sen GC, Diamond MS.** 2012. 2'-O methylation of the viral  
1327 mRNA cap by West Nile virus evades ifit1-dependent and -independent  
1328 mechanisms of host restriction in vivo. *PLoS Pathog* **8**:e1002698.
- 1329 83. **Burke JM, Moon SL, Matheny T, Parker R.** 2019. RNase L Reprograms  
1330 Translation by Widespread mRNA Turnover Escaped by Antiviral mRNAs. *Mol*  
1331 *Cell* **75**:1203-1217 e1205.
- 1332 84. **Rath S, Prangle E, Donovan J, Demarest K, Wingreen NS, Meir Y,**  
1333 **Korenykh A.** 2019. Concerted 2-5A-Mediated mRNA Decay and Transcription

- 1334            Reprogram Protein Synthesis in the dsRNA Response. *Mol Cell* **75**:1218-1228  
1335            e1216.
- 1336    85.    **Rivas E, Clements J, Eddy SR.** 2017. A statistical test for conserved RNA  
1337            structure shows lack of evidence for structure in lncRNAs. *Nat Methods* **14**:45-48.
- 1338    86.    **Nawrocki EP, Eddy SR.** 2013. Infernal 1.1: 100-fold faster RNA homology  
1339            searches. *Bioinformatics* **29**:2933-2935.
- 1340

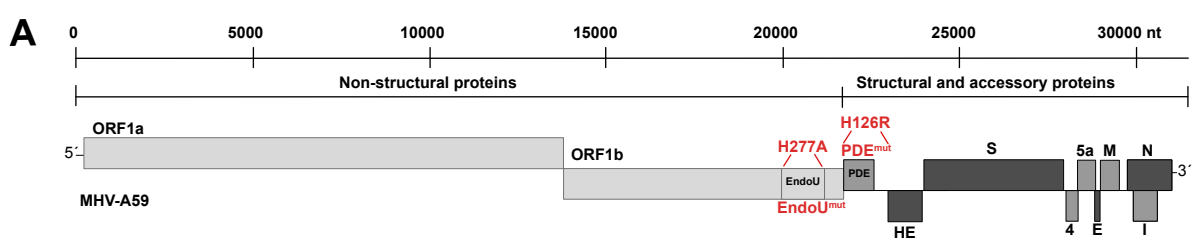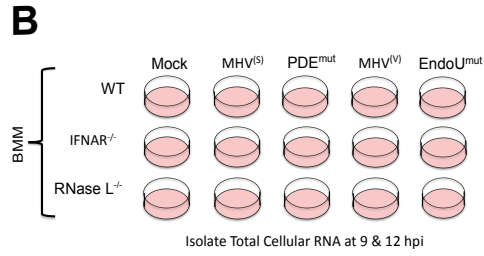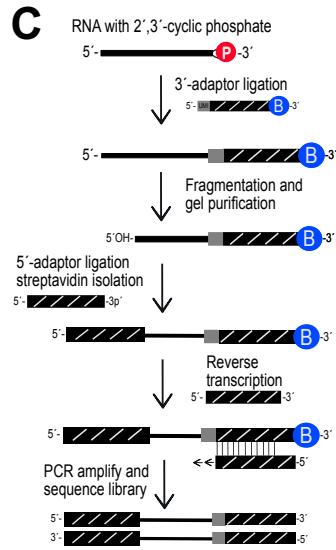

Figure 1

**A**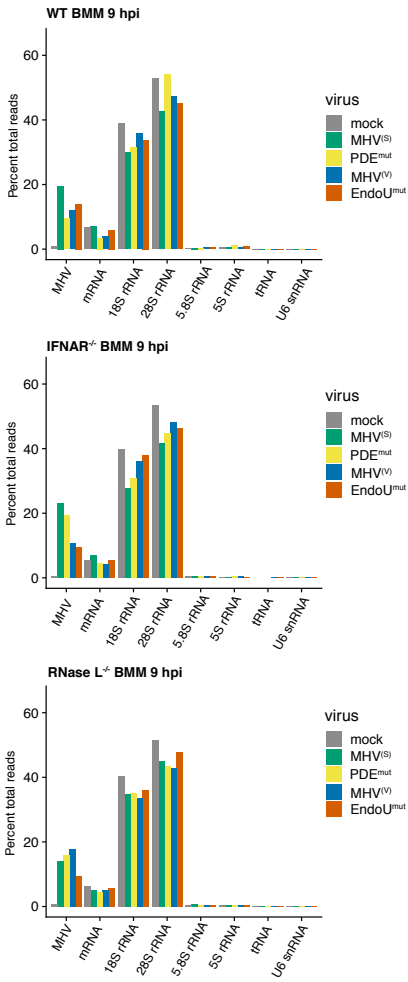**B**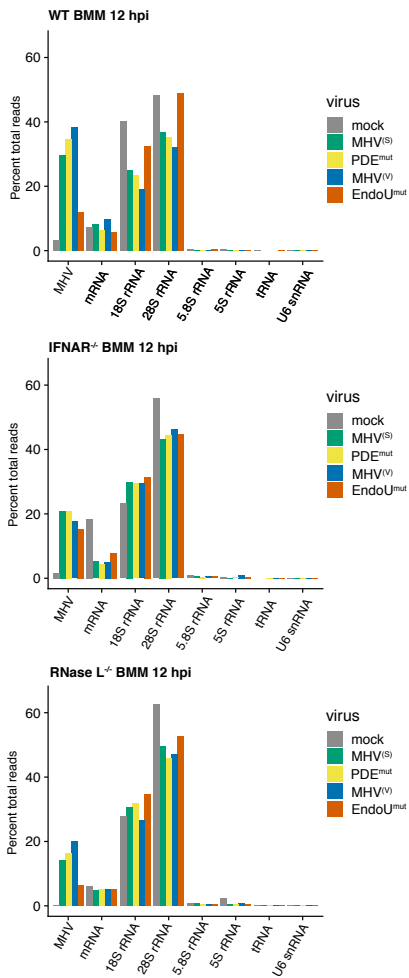

Figure 2

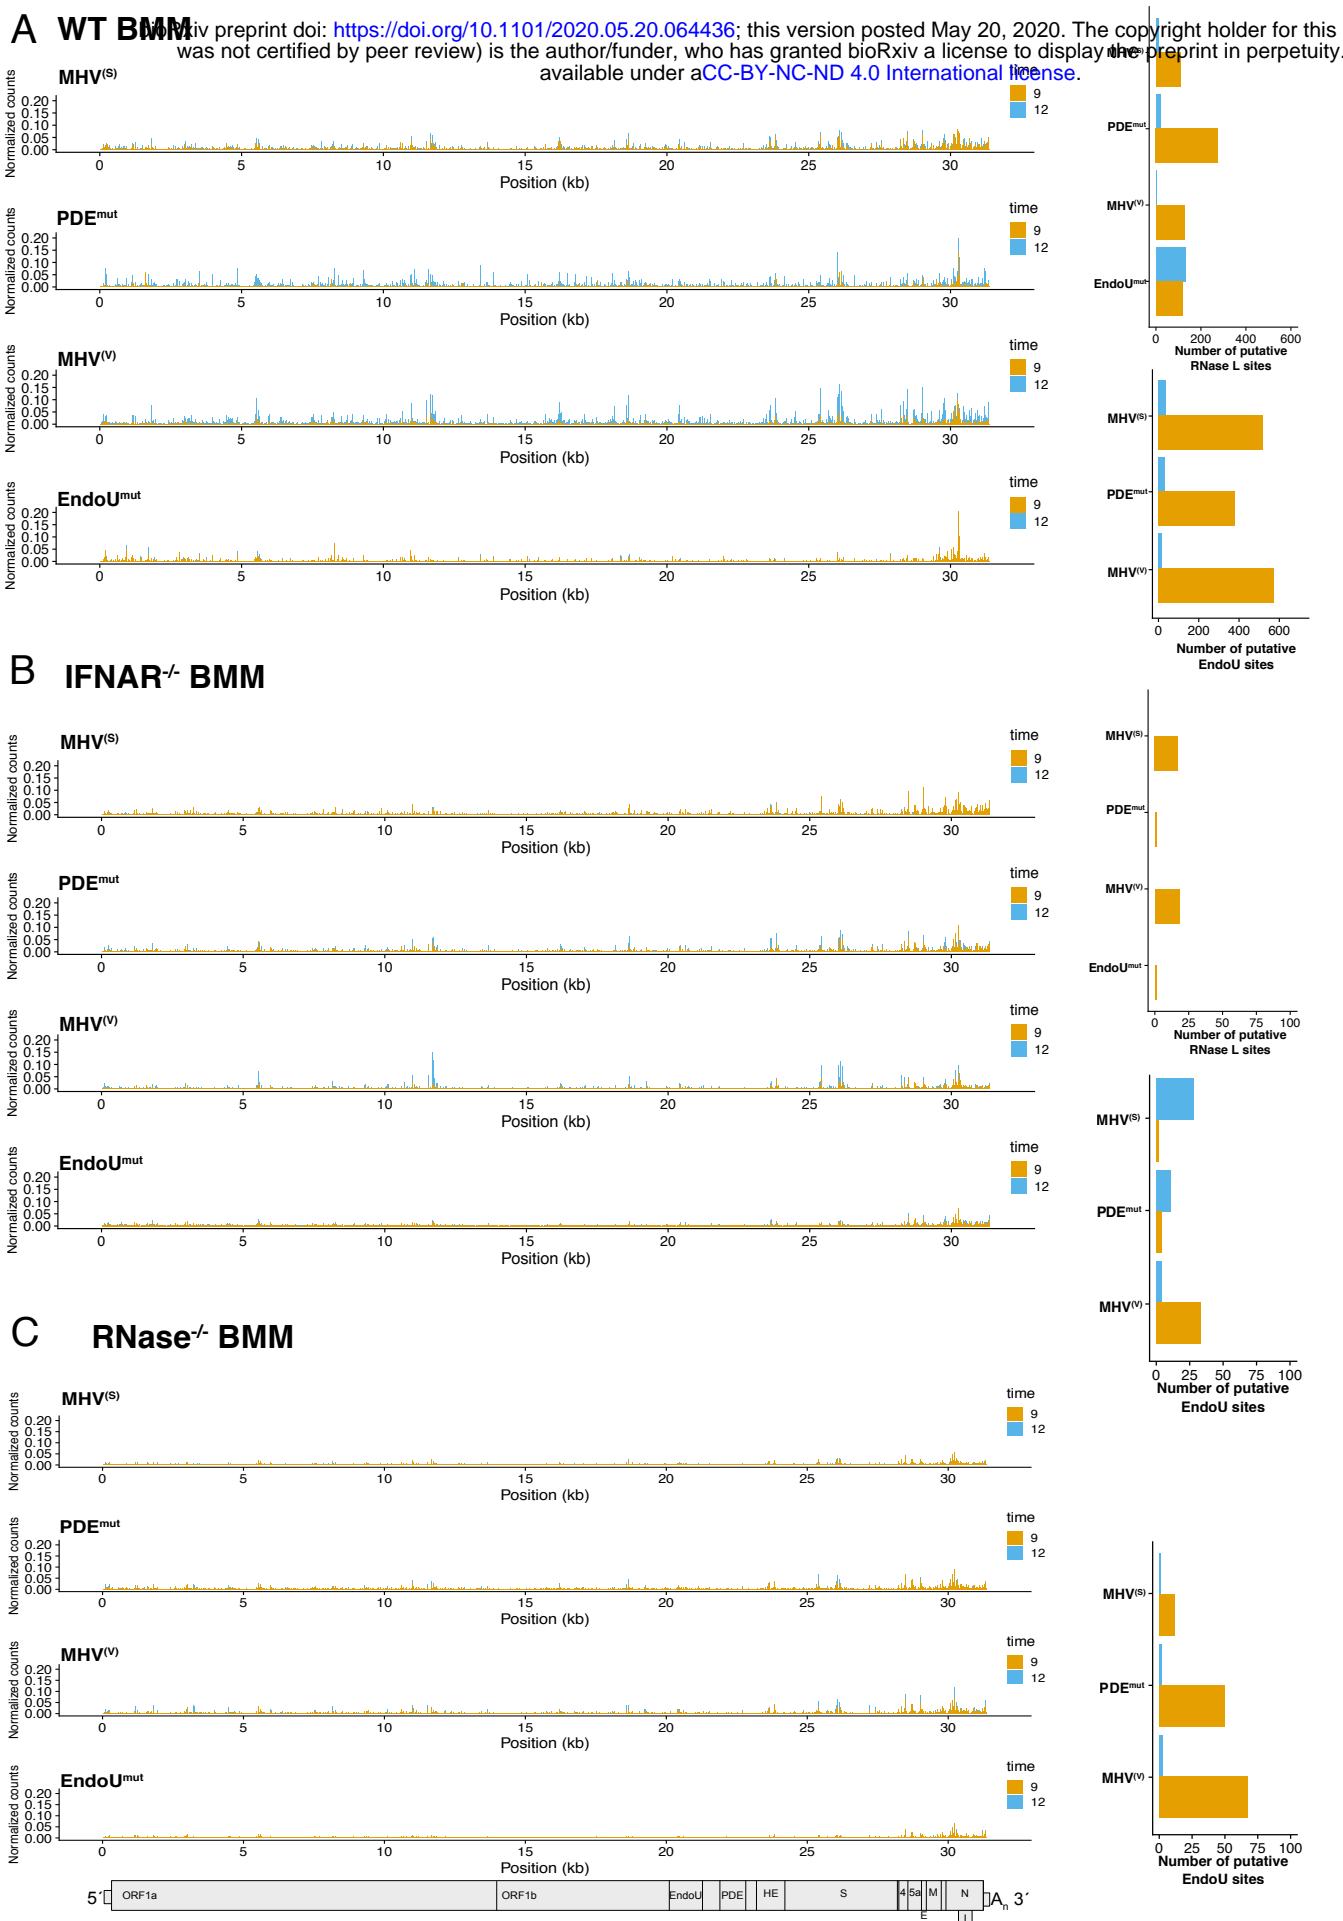

Figure 3

## Dinucleotide cleavage analysis

### A Position -2 to -1 dinucleotide analysis

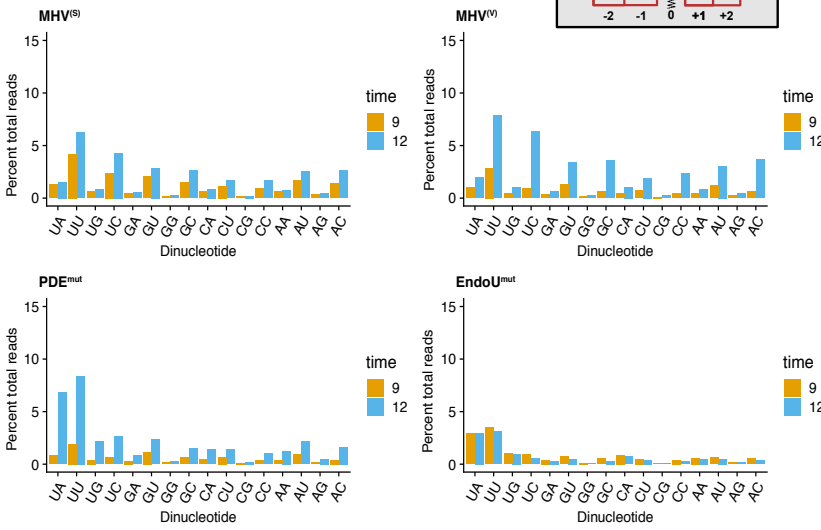

### B Dinucleotide enrichment in WT BMM (position -2 to -1)

| Dinucleotide | MHV <sup>(S)</sup> Fold change | MHV <sup>(V)</sup> Fold change | PDE <sup>mut</sup> Fold change | EndoU <sup>mut</sup> Fold change |
|--------------|--------------------------------|--------------------------------|--------------------------------|----------------------------------|
| UA           | -0.57                          | -0.59                          | 1.36***                        | <b>1.71***</b>                   |
| UU           | 1.01***                        | 0.97***                        | 1.22***                        | 1.35***                          |
| UC           | <b>1.80***</b>                 | <b>1.99***</b>                 | 0.87***                        | 0.15**                           |
| GU           | 0.29***                        | 0.15**                         | -0.23                          | -0.94                            |
| GC           | 0.69***                        | 0.78***                        | -0.30                          | -1.01                            |
| CA           | -0.89                          | -1.00                          | -0.42                          | 0.20**                           |
| CC           | 0.52**                         | 0.62**                         | -0.45                          | -1.03                            |
| AU           | 0.10*                          | 0.00                           | -0.34                          | -0.90                            |
| AC           | 0.98***                        | 1.11***                        | 0.10*                          | -0.61                            |

### C RNase L cleavage preference

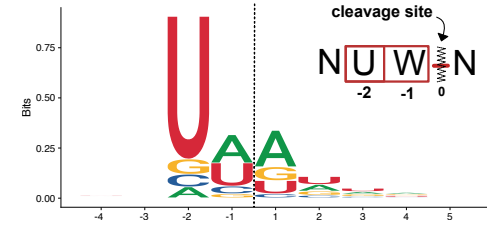

### D Position -1 to +1 dinucleotide analysis

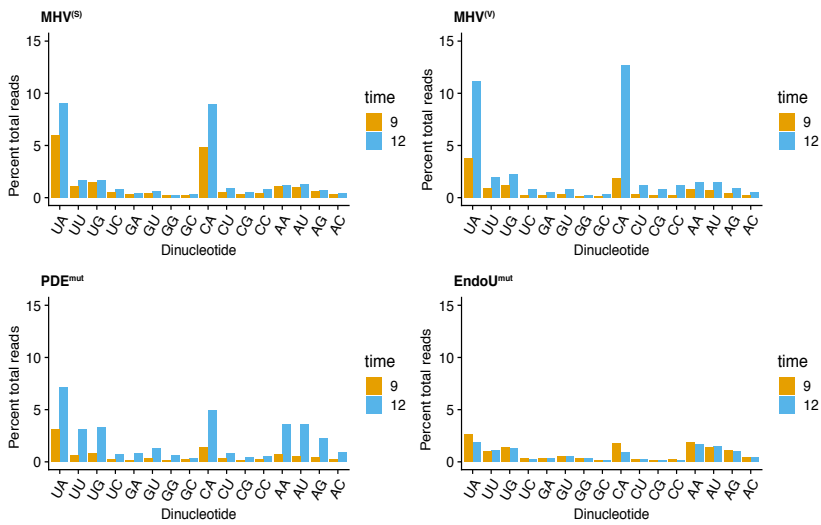

### E Dinucleotide enrichment in WT BMM (position -1 to +1)

| Dinucleotide | MHV <sup>(S)</sup> Fold change | MHV <sup>(V)</sup> Fold change | PDE <sup>mut</sup> Fold change | EndoU <sup>mut</sup> Fold change |
|--------------|--------------------------------|--------------------------------|--------------------------------|----------------------------------|
| UA           | <b>2.00***</b>                 | <b>1.93***</b>                 | 1.43***                        | 1.02***                          |
| UG           | -0.82                          | -0.79                          | -0.06                          | 0.15**                           |
| CA           | <b>2.46***</b>                 | <b>2.60***</b>                 | 1.40***                        | 0.56***                          |
| AA           | -0.83                          | -0.89                          | 0.51**                         | 0.98***                          |
| AU           | -0.88                          | -1.00                          | 0.37***                        | 0.62***                          |
| AG           | -1.36                          | -1.44                          | 0.04                           | 0.41***                          |

### F EndoU cleavage preference

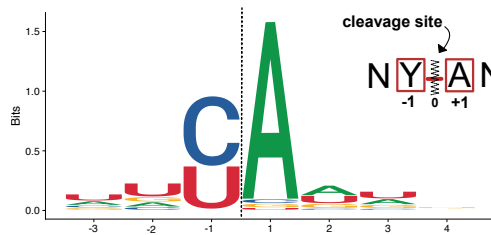

### G

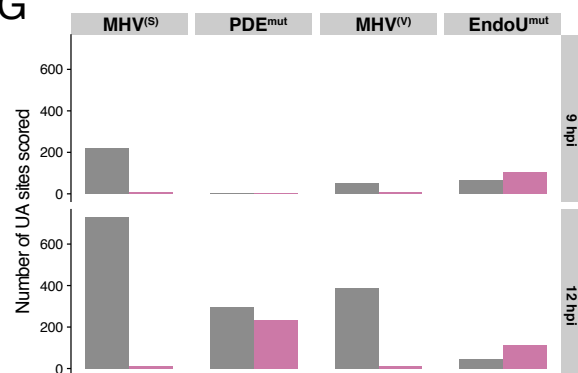

### H

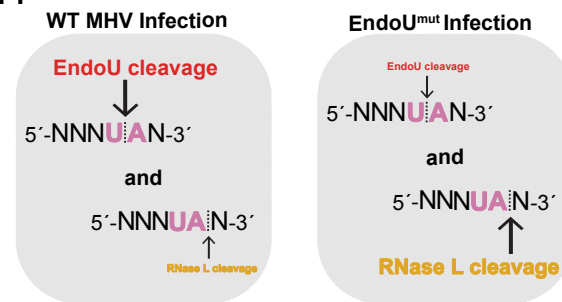

Figure 4



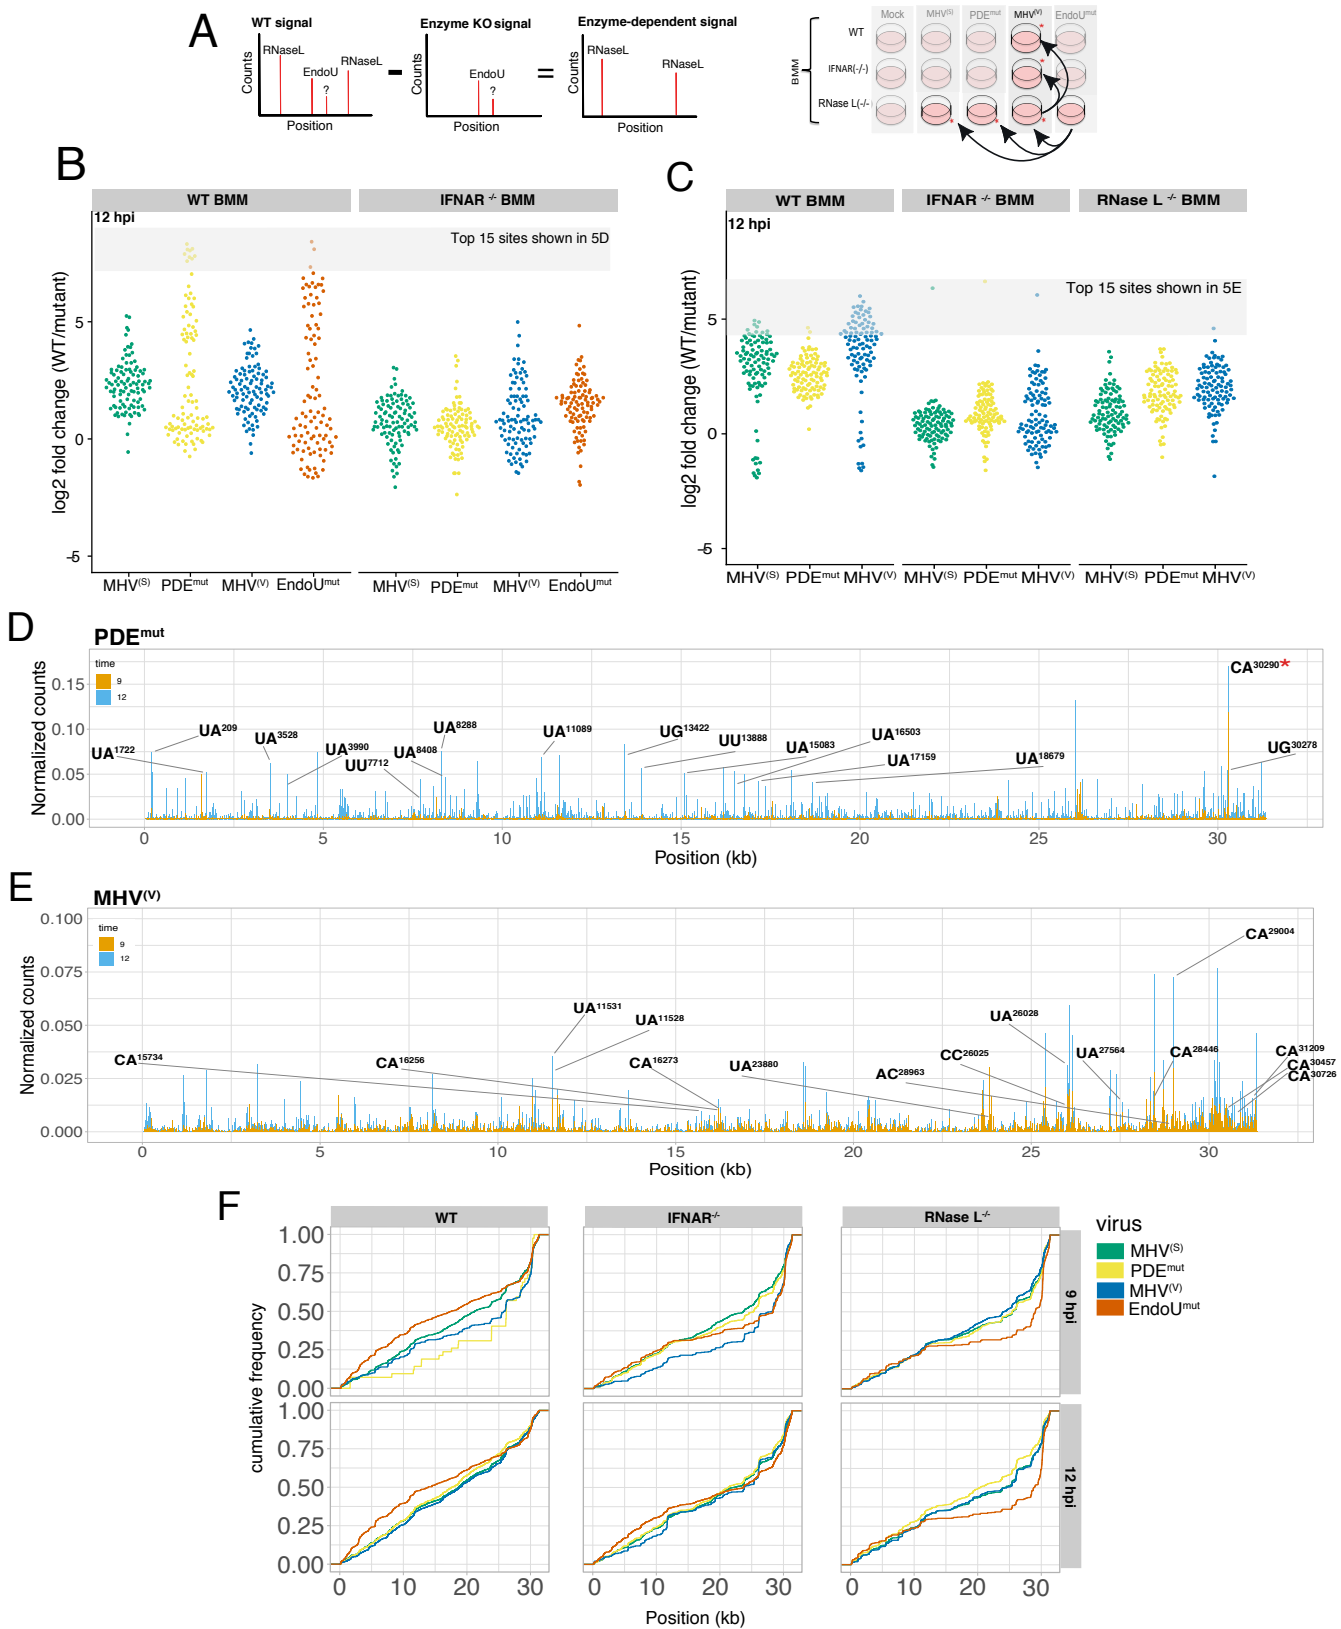

Figure 5

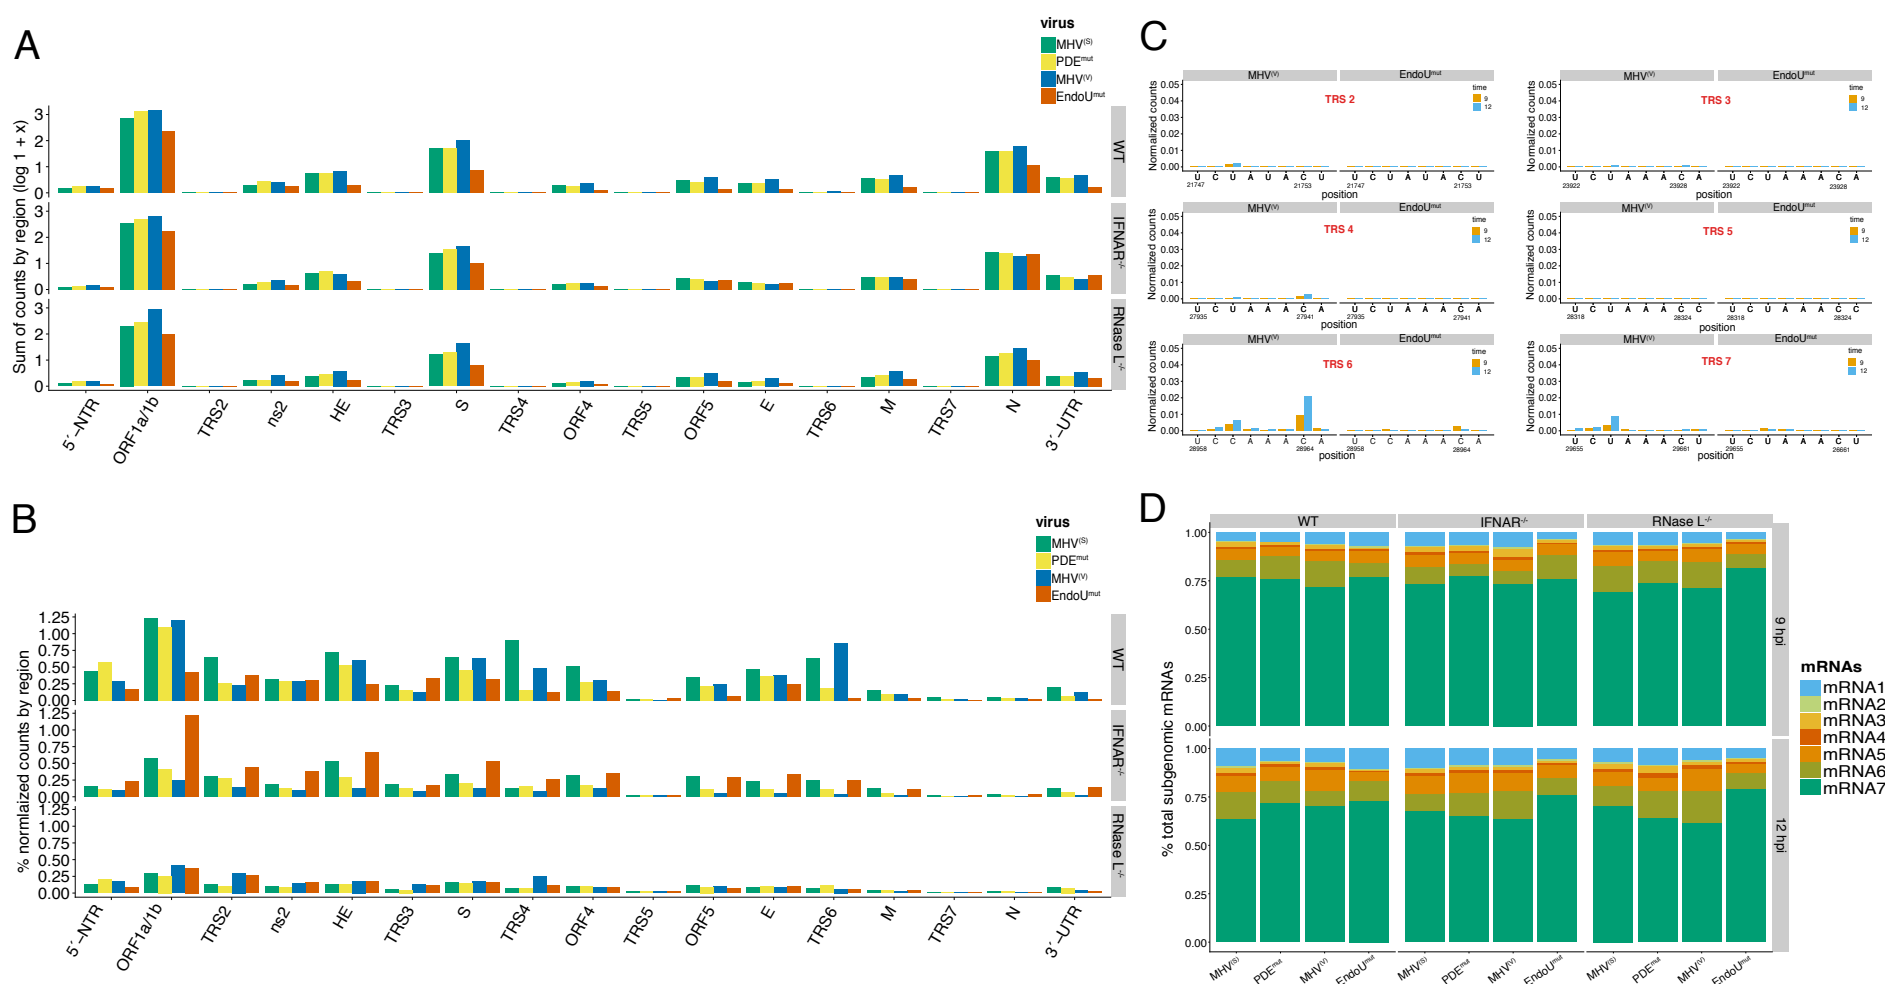

Figure 6

### A Frameshift stimulation element for ORF1

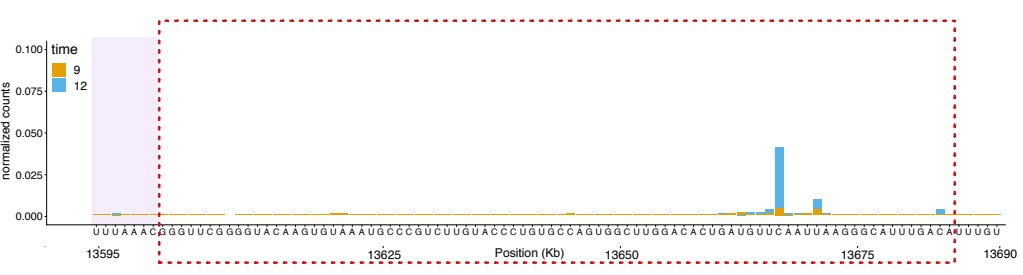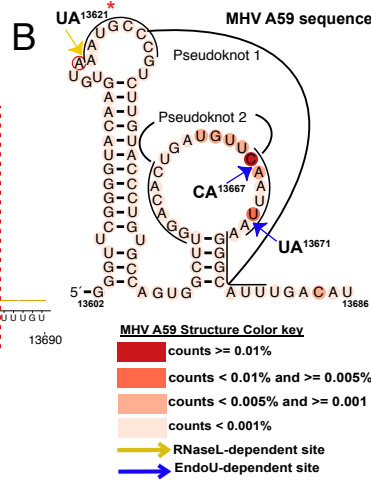

### C Pseudoknot in 3'-UTR

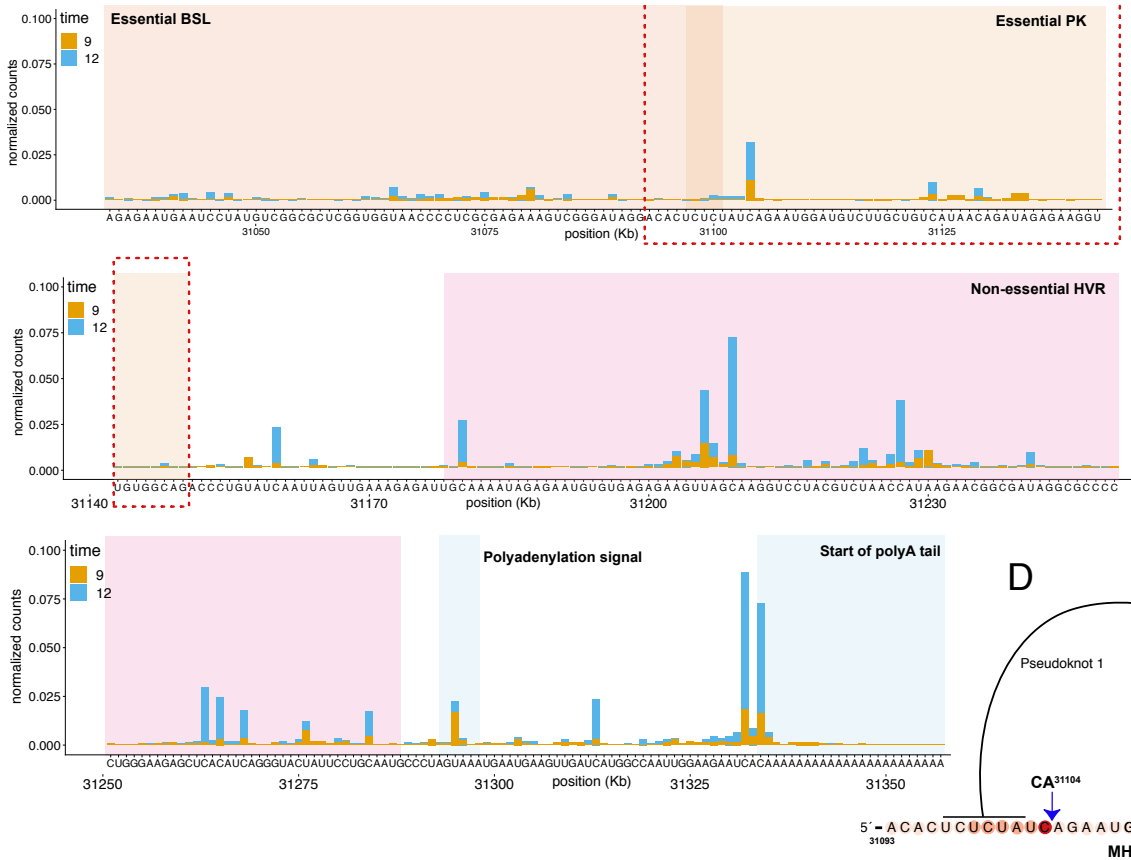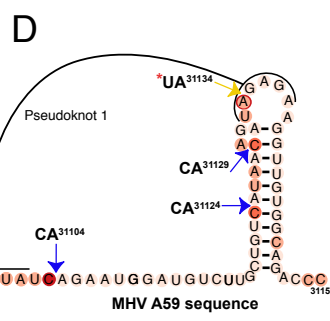

Figure 7

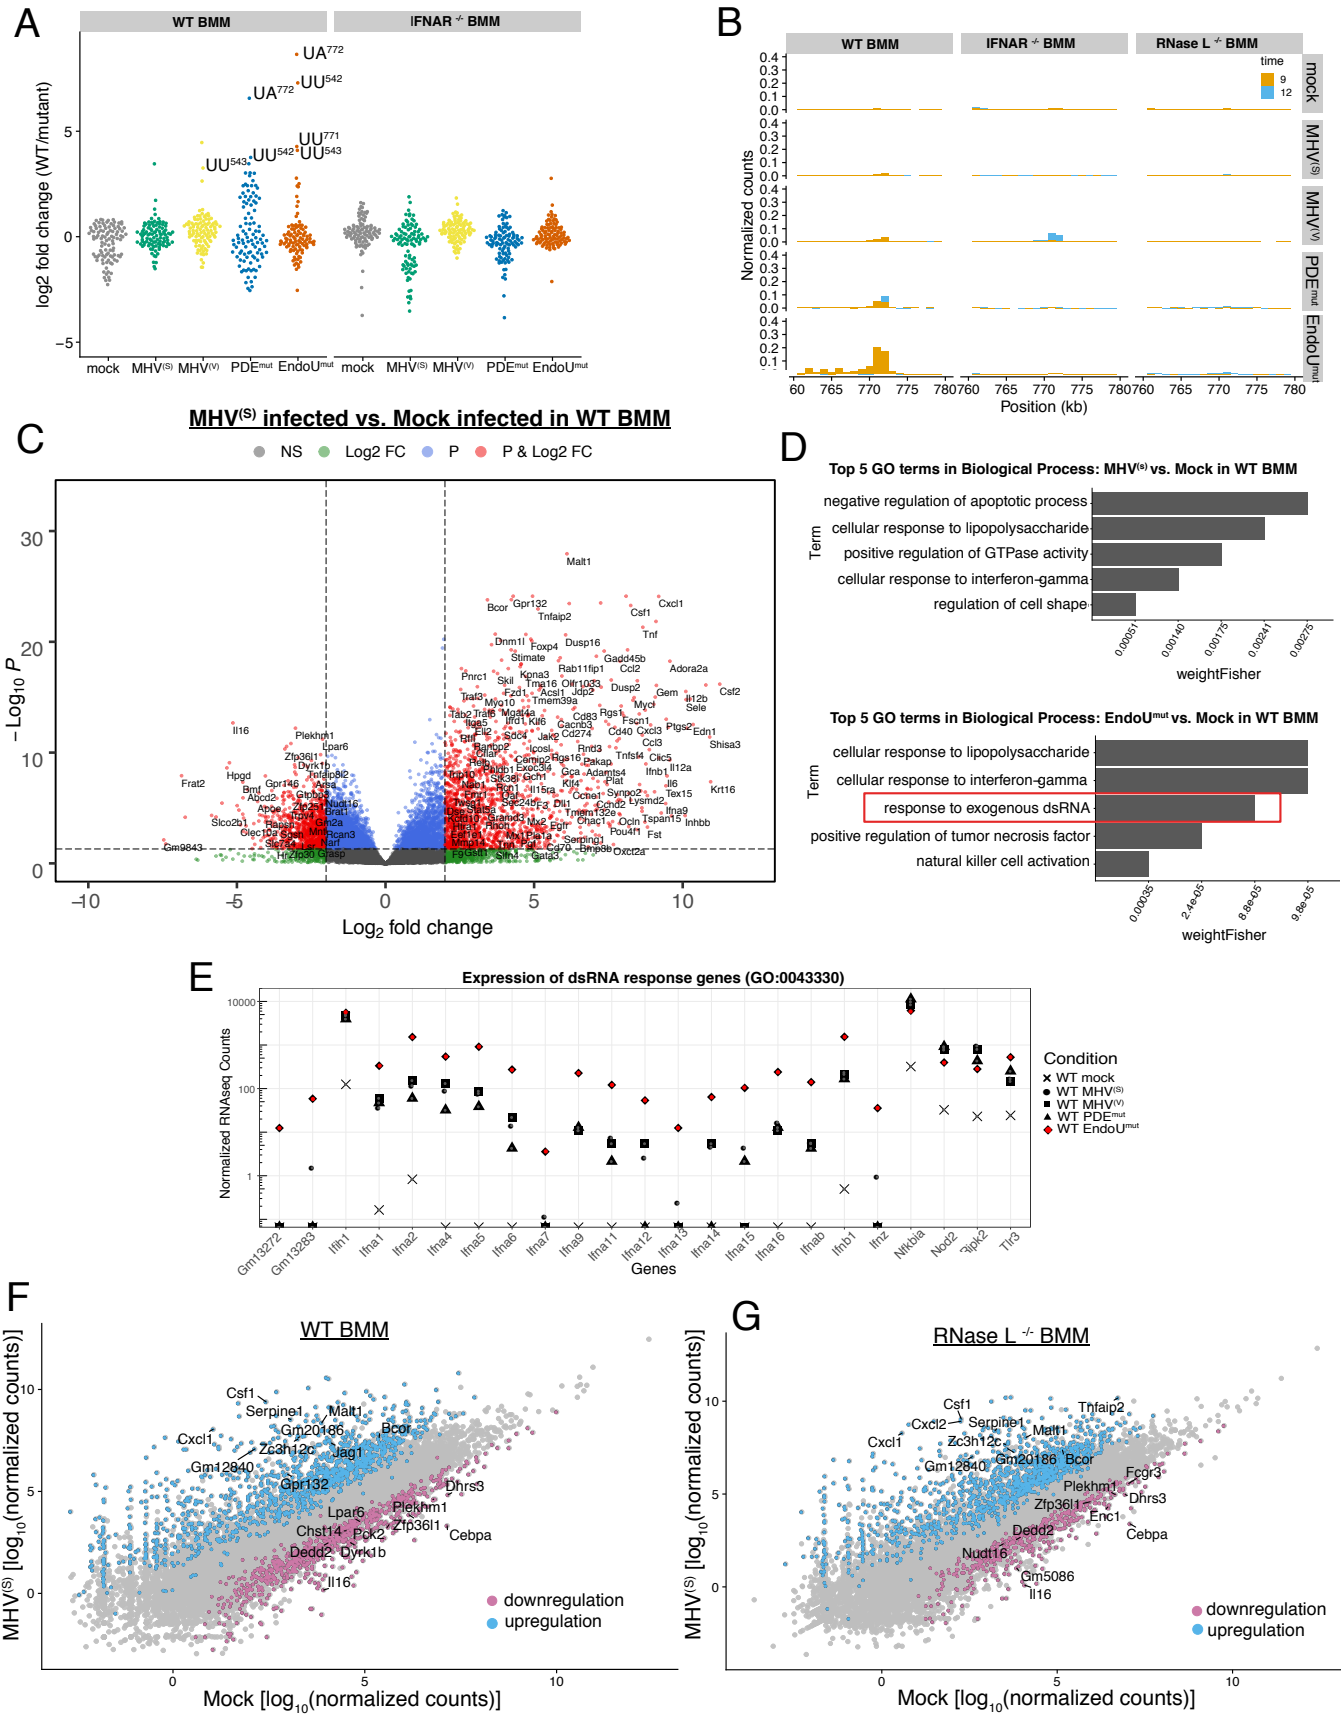

Figure 8

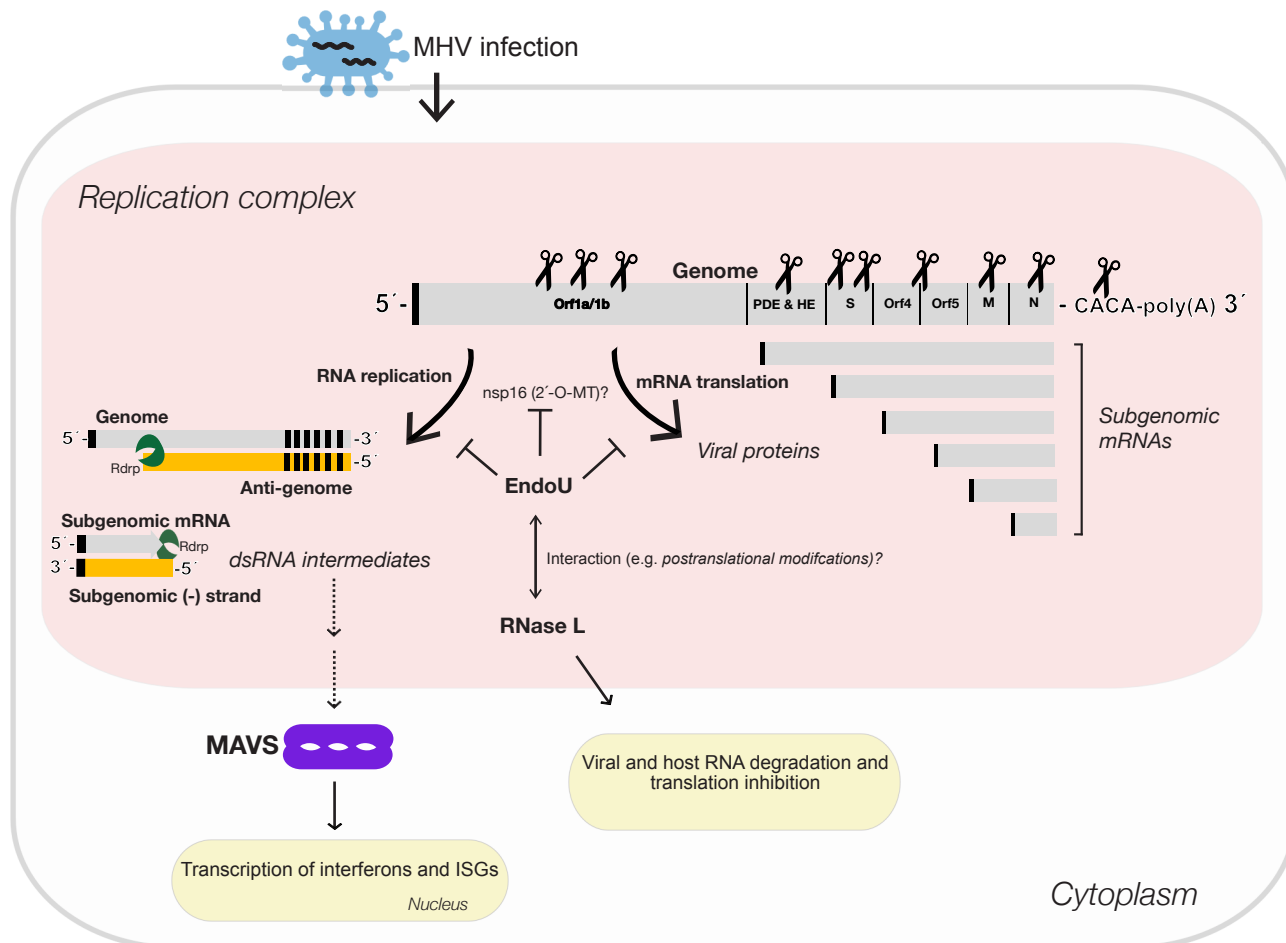

Figure 9
